# Supplementary material for: Spirocyclic systems derived from pyroglutamic acid
Source: Royal Society of Chemistry journal article supplement (doi:10.1039/c1ob05708a), 2011-01-01

## Supplementary Information

### **Spirocyclic systems derived from pyroglutamic acid**

Andrew R. Cowley, Thomas J. Hill, Petr Kocis, Mark G.  
Moloney, Robert D. Stevenson and Amber L. Thompson



|                        |                      |                   |                                                       |                                                                       |                      |
|------------------------|----------------------|-------------------|-------------------------------------------------------|-----------------------------------------------------------------------|----------------------|
| Acquisition Time (sec) | 1.0486               | Comment           | Instrument AVC500 Group MGM 1995 Benjamin Tan 10/1/11 | Date                                                                  | 11 Jan 2011 12:16:00 |
| Date Stamp             | 11 Jan 2011 12:16:00 |                   | File Name                                             | C:\Documents and Settings\mgmgroup\CHEM\Desktop\bt19951001\4\data1\1r |                      |
| Frequency (MHz)        | 125.80               | Nucleus           | 13C                                                   | Number of Transients                                                  | 1024                 |
| Original Points Count  | 32768                | Owner             | dp-nmrgroup                                           | Points Count                                                          | 32768                |
| Receiver Gain          | 1820.00              | SW(cyclical) (Hz) | 31250.00                                              | Solvent                                                               | CHLOROFORM-d         |
| Spectrum Type          | STANDARD             | Sweep Width (Hz)  | 31249.05                                              | Temperature (degree C)                                                | 24.970               |
|                        |                      |                   |                                                       | Spectrum Offset (Hz)                                                  | 12571.3047           |

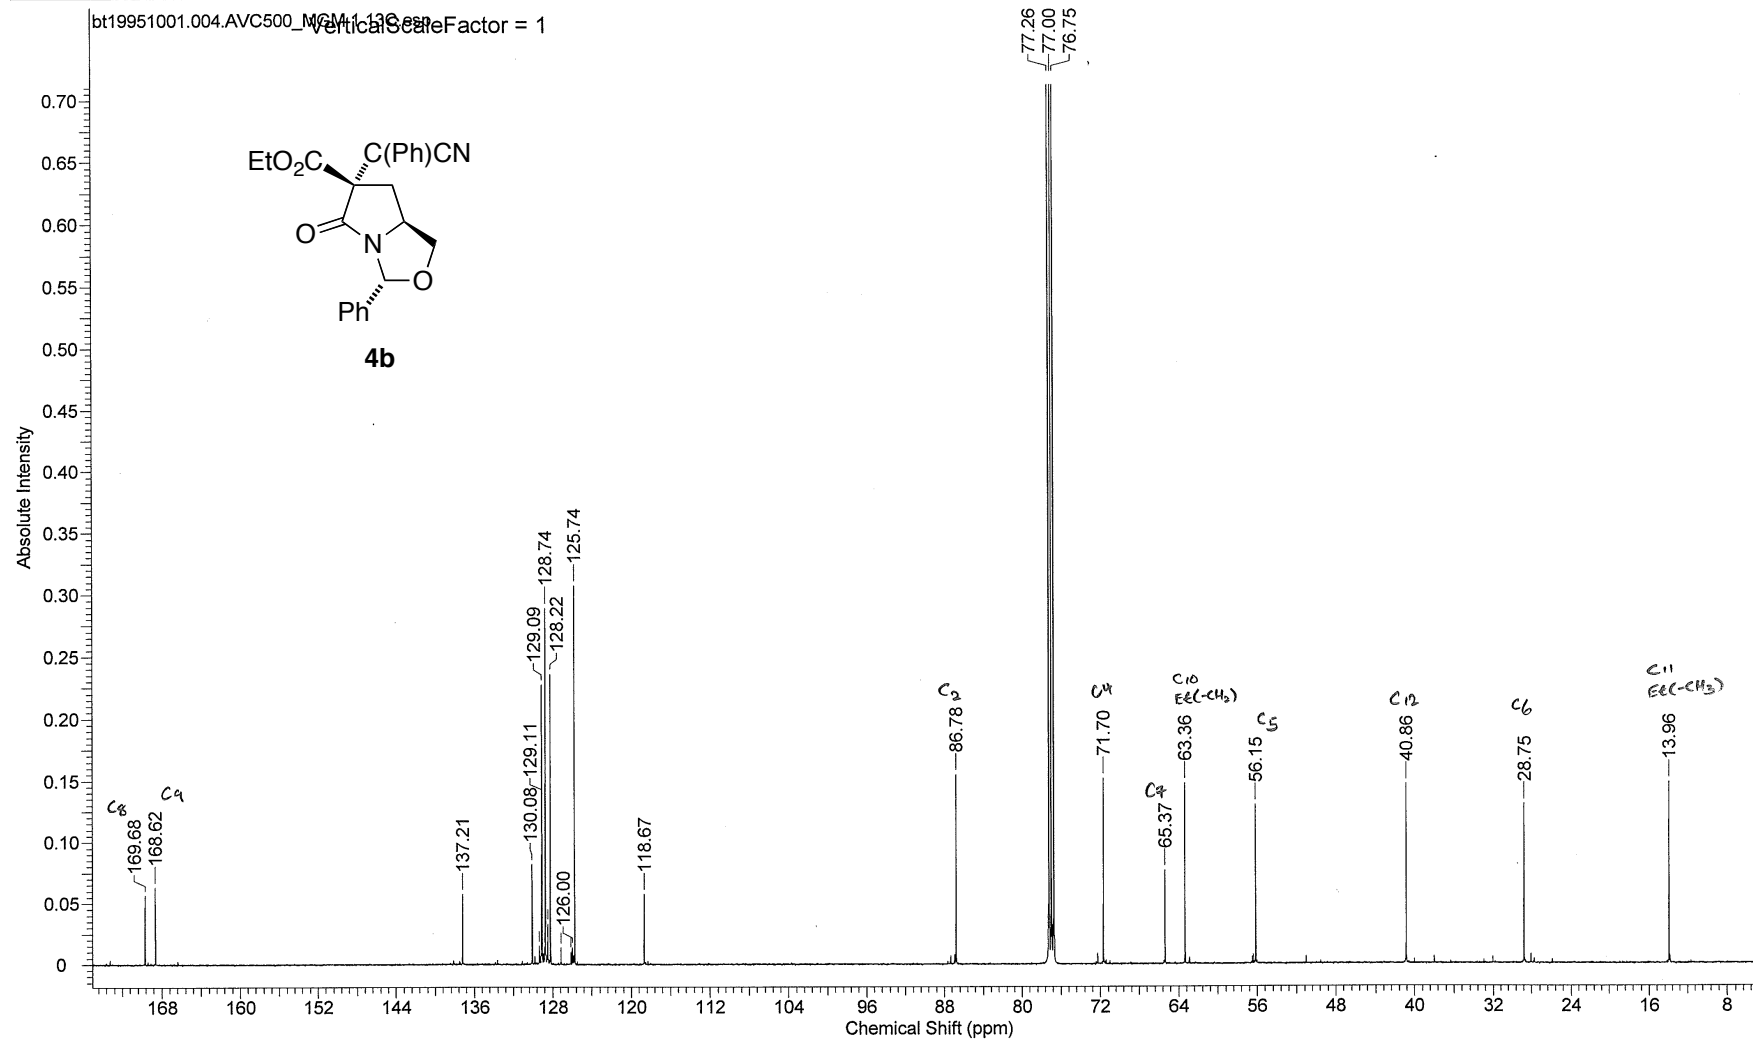

|                               |                      |                          |                                                                          |                               |              |                             |           |
|-------------------------------|----------------------|--------------------------|--------------------------------------------------------------------------|-------------------------------|--------------|-----------------------------|-----------|
| <b>Acquisition Time (sec)</b> | 3.1719               | <b>Comment</b>           | Instrument AVC500 Group MGM 2125 Benjamin Tan 18/1/11                    |                               | <b>Date</b>  | 20 Jan 2011 03:05:36        |           |
| <b>Date Stamp</b>             | 20 Jan 2011 03:05:36 | <b>File Name</b>         | C:\Documents and Settings\imgmgroup\CHEM\Desktop\bt212518011\1\data\1\1r |                               |              |                             |           |
| <b>Frequency (MHz)</b>        | 500.30               | <b>Nucleus</b>           | 1H                                                                       | <b>Number of Transients</b>   | 16           | <b>Origin</b>               | avc500    |
| <b>Original Points Count</b>  | 32768                | <b>Owner</b>             | dp-nmrgroup                                                              | <b>Points Count</b>           | 32768        | <b>Pulse Sequence</b>       | zg30      |
| <b>Receiver Gain</b>          | 4.00                 | <b>SW(cyclical) (Hz)</b> | 10330.58                                                                 | <b>Solvent</b>                | CHLOROFORM-d | <b>Spectrum Offset (Hz)</b> | 3065.5417 |
| <b>Spectrum Type</b>          | STANDARD             | <b>Sweep Width (Hz)</b>  | 10330.26                                                                 | <b>Temperature (degree C)</b> | 24.970       |                             |           |

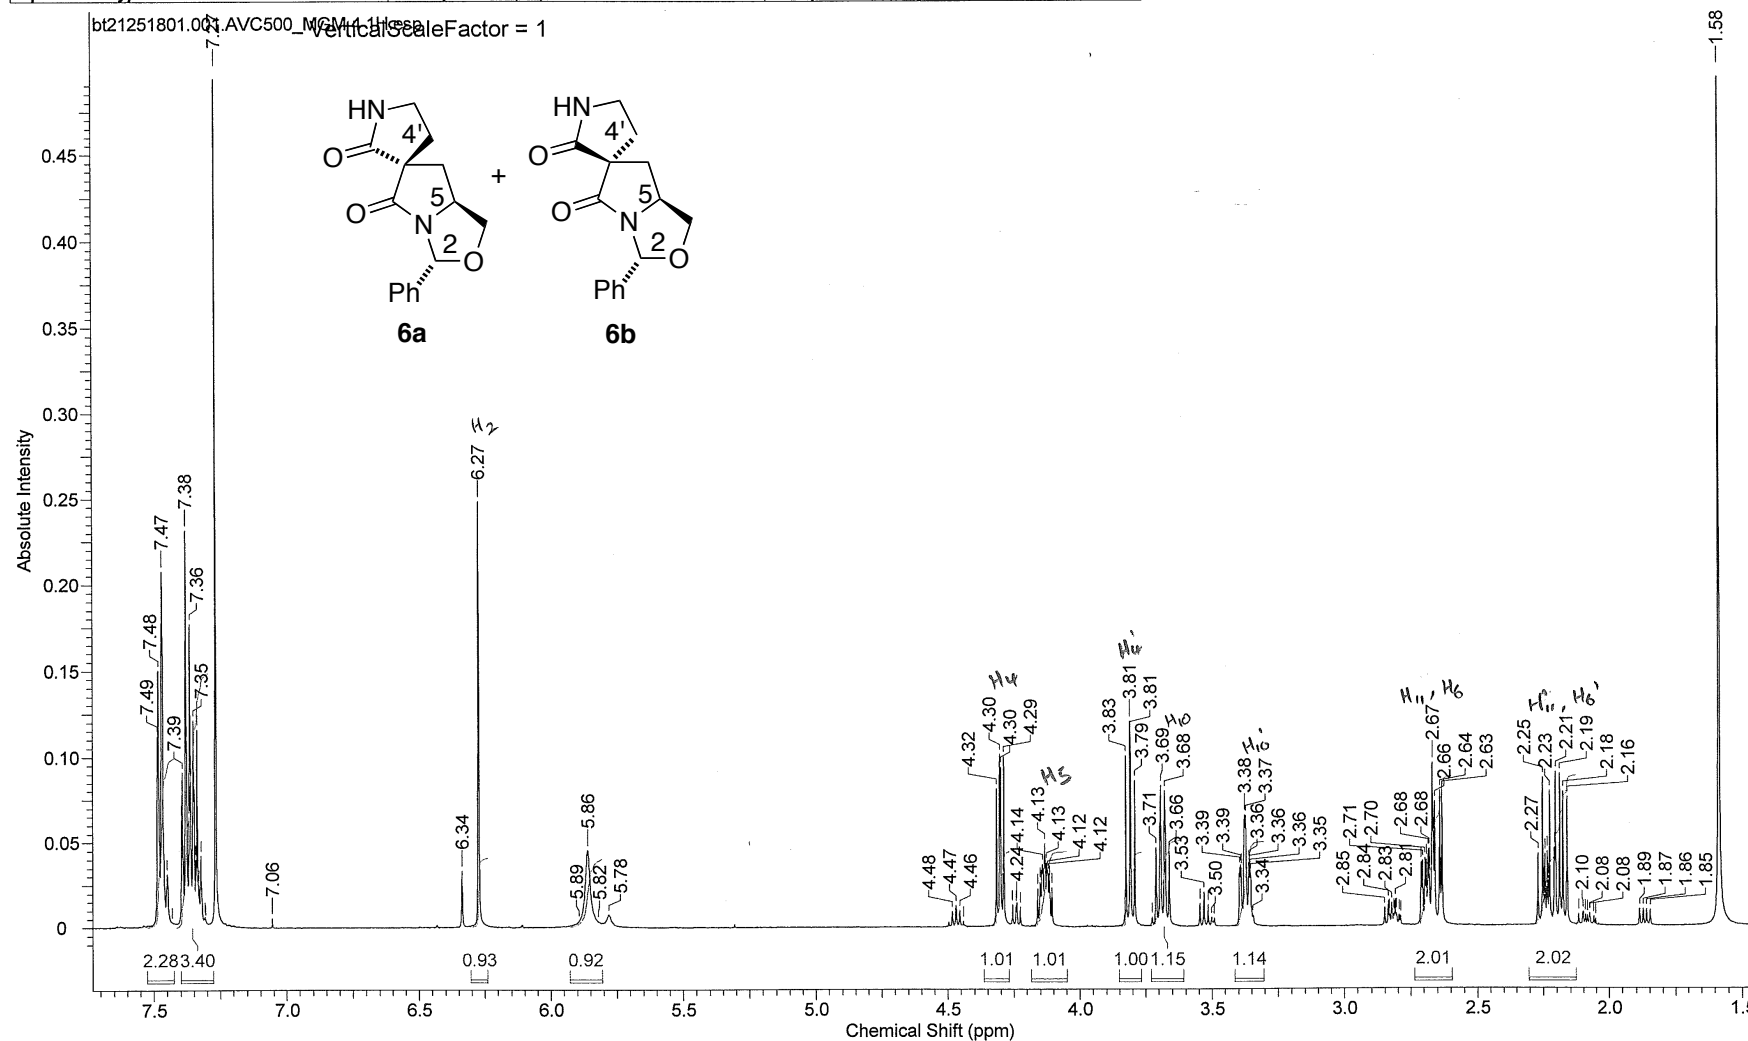

|                        |                      |                   |                                                                        |                        |              |                      |            |
|------------------------|----------------------|-------------------|------------------------------------------------------------------------|------------------------|--------------|----------------------|------------|
| Acquisition Time (sec) | 1.0486               | Comment           | Instrument AVC500 Group MGM 2125 Benjamin Tan 18/1/11                  |                        | Date         | 20 Jan 2011 04:16:00 |            |
| Date Stamp             | 20 Jan 2011 04:16:00 | File Name         | C:\Documents and Settings\mngmgroup\CHEM\Desktop\bt21251801\4\data\11r |                        |              |                      |            |
| Frequency (MHz)        | 125.80               | Nucleus           | 13C                                                                    | Number of Transients   | 1024         | Origin               | avc500     |
| Original Points Count  | 32768                | Owner             | dp-nmrgroup                                                            | Points Count           | 32768        | Pulse Sequence       | zgpg30     |
| Receiver Gain          | 812.00               | SW(cyclical) (Hz) | 31250.00                                                               | Solvent                | CHLOROFORM-d | Spectrum Offset (Hz) | 12571.3047 |
| Spectrum Type          | STANDARD             | Sweep Width (Hz)  | 31249.05                                                               | Temperature (degree C) | 24.970       |                      |            |

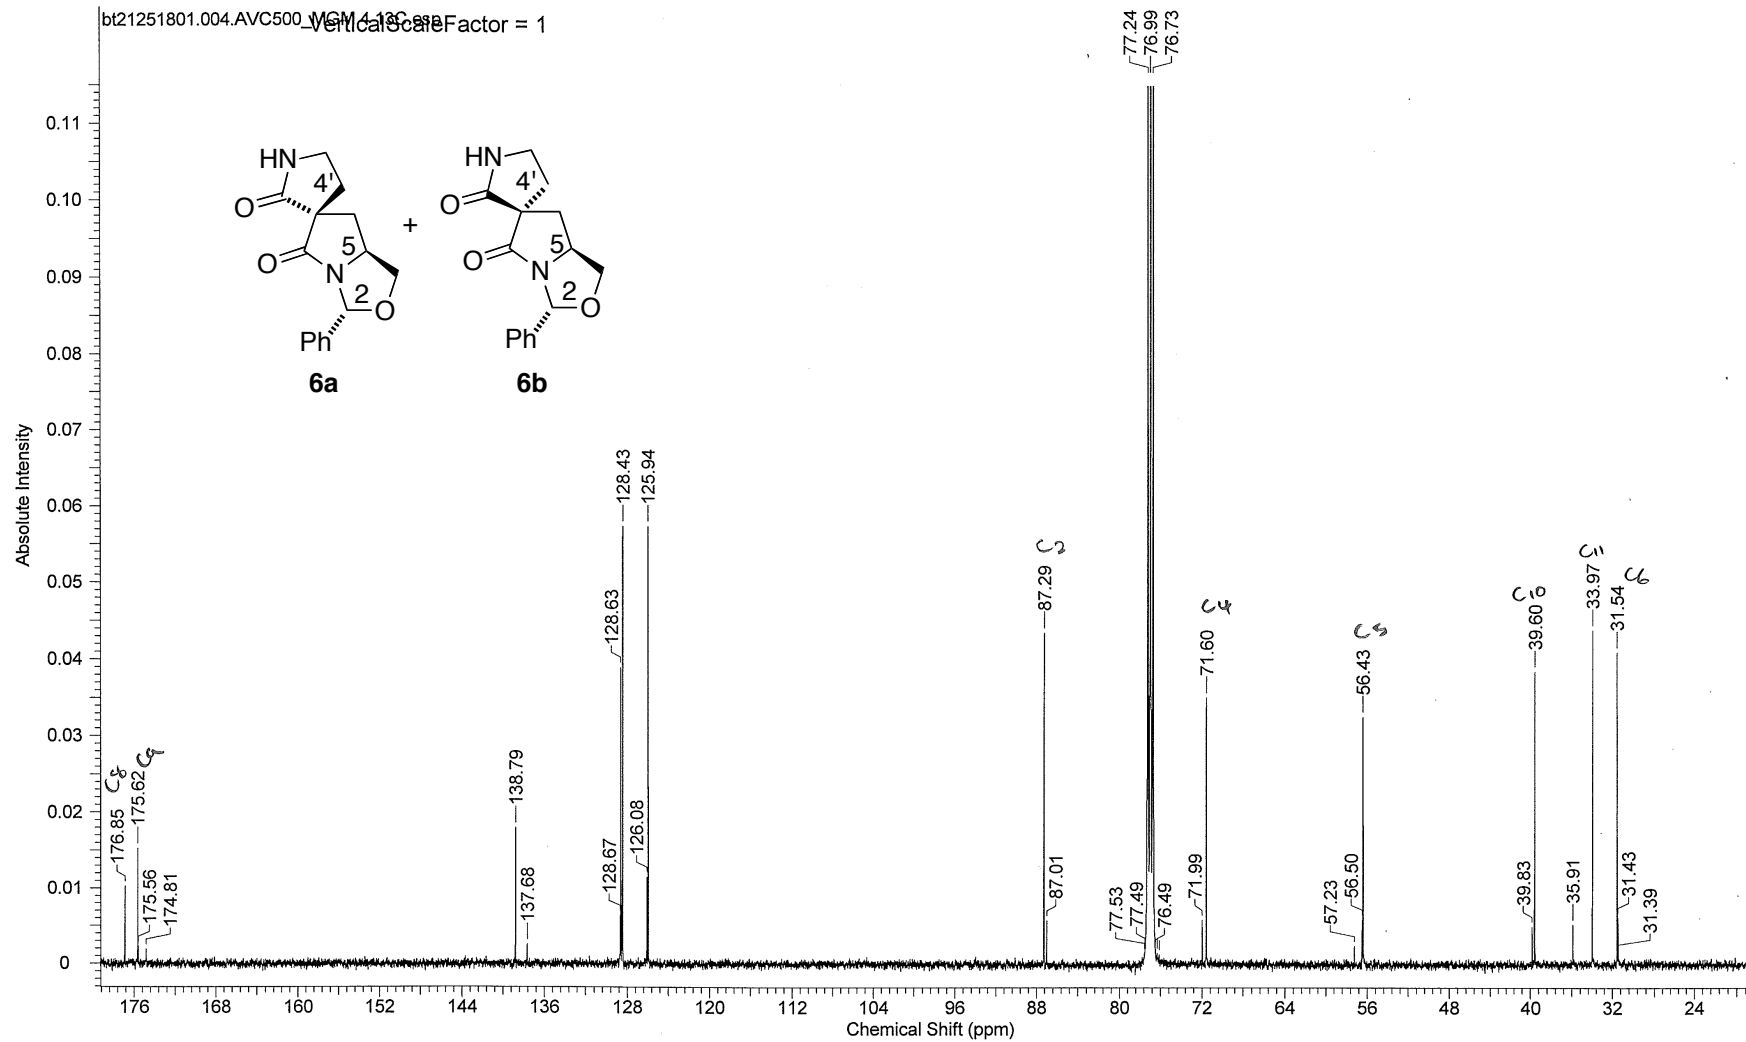

|                        |                      |                   |                                                                         |                        |                      |
|------------------------|----------------------|-------------------|-------------------------------------------------------------------------|------------------------|----------------------|
| Acquisition Time (sec) | 3.1719               | Comment           | Instrument AVC500 Group MGM 2051 Benjamin Tan 13/1/11                   | Date                   | 15 Jan 2011 13:15:44 |
| Date Stamp             | 15 Jan 2011 13:15:44 | File Name         | C:\Documents and Settings\mngmgroup\CHEM\Desktop\bt205113011\pdata\111r |                        |                      |
| Frequency (MHz)        | 500.30               | Nucleus           | 1H                                                                      | Number of Transients   | 16                   |
| Original Points Count  | 32768                | Owner             | dp-nmrgroup                                                             | Points Count           | 32768                |
| Receiver Gain          | 4.00                 | SW(cyclical) (Hz) | 10330.58                                                                | Solvent                | CHLOROFORM-d         |
| Spectrum Type          | STANDARD             | Sweep Width (Hz)  | 10330.26                                                                | Temperature (degree C) | 24.970               |
|                        |                      |                   |                                                                         | Spectrum Offset (Hz)   | 3065.5417            |

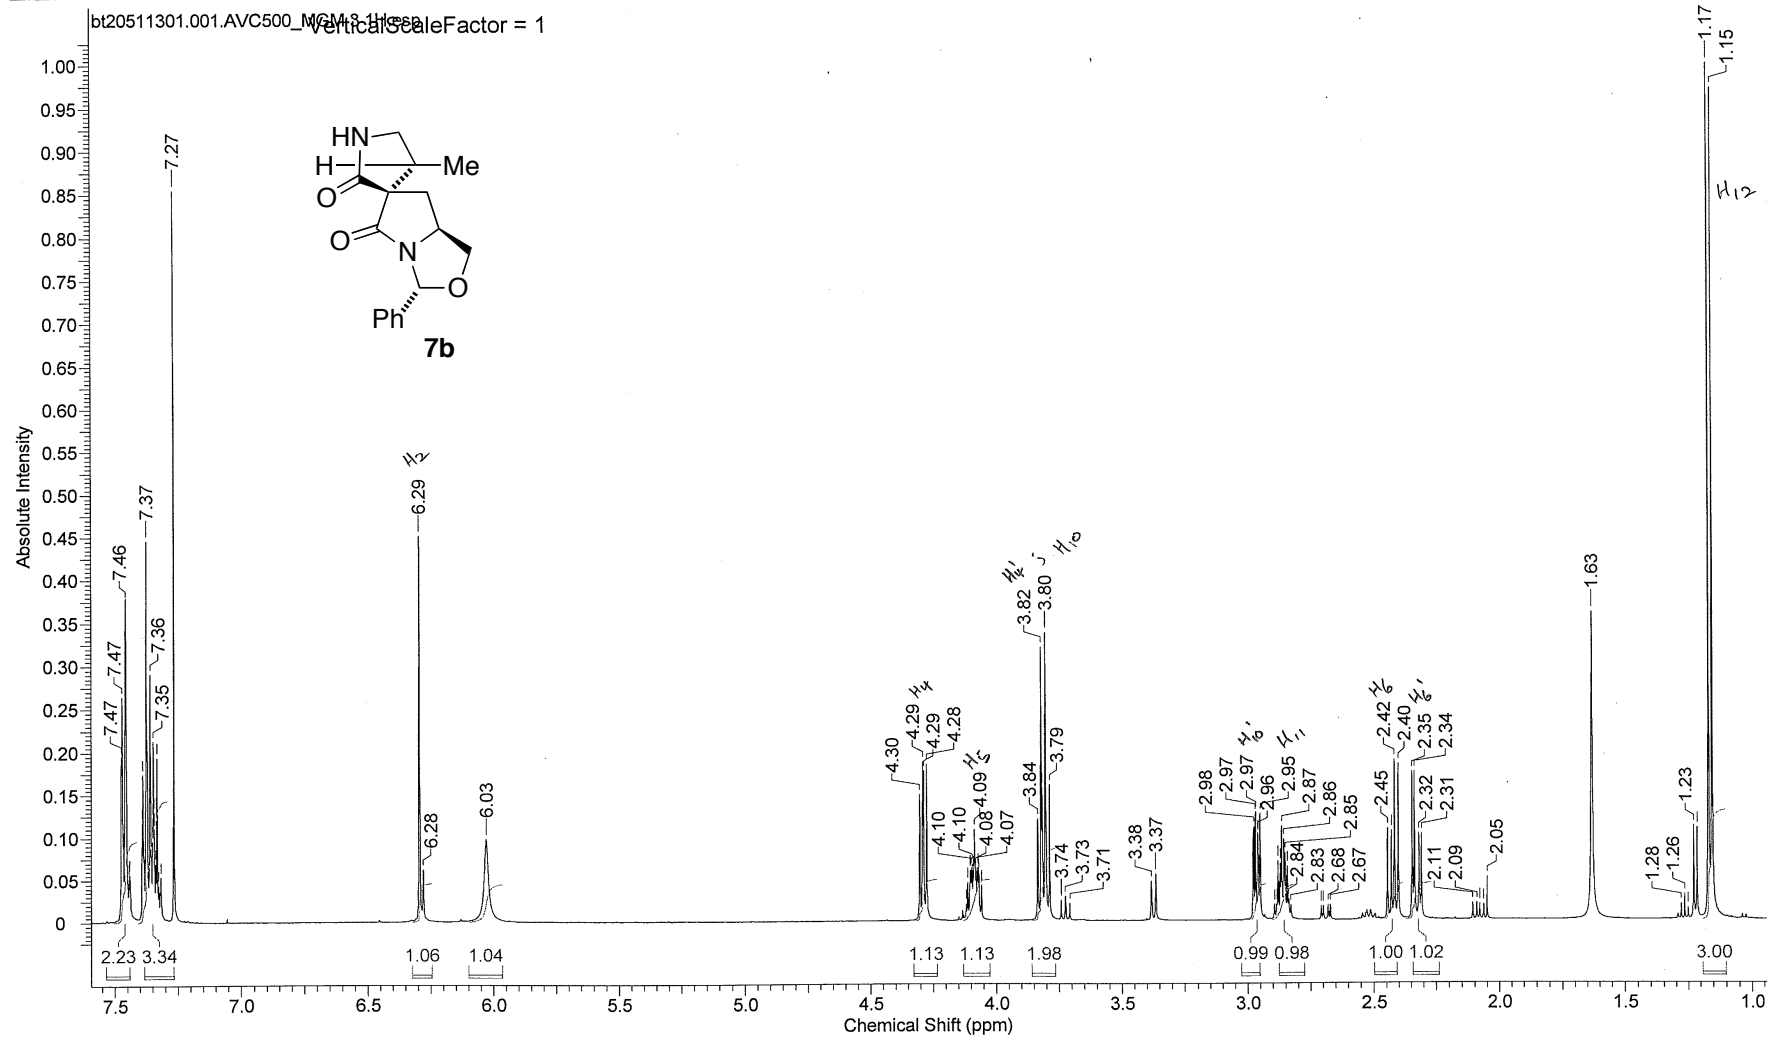

|                        |                      |                   |                                                                       |                        |              |                      |            |
|------------------------|----------------------|-------------------|-----------------------------------------------------------------------|------------------------|--------------|----------------------|------------|
| Acquisition Time (sec) | 1.0486               | Comment           | Instrument AVC500 Group MGM 2051 Benjamin Tan 13/1/11                 |                        | Date         | 15 Jan 2011 14:26:08 |            |
| Date Stamp             | 15 Jan 2011 14:26:08 | File Name         | C:\Documents and Settings\mgmgroup\CHEM\Desktop\bt205113014\pdata1\1r |                        |              |                      |            |
| Frequency (MHz)        | 125.80               | Nucleus           | 13C                                                                   | Number of Transients   | 1024         | Origin               | avc500     |
| Original Points Count  | 32768                | Owner             | dp-nmrgroup                                                           | Points Count           | 32768        | Pulse Sequence       | zgpg30     |
| Receiver Gain          | 1820.00              | SW(cyclical) (Hz) | 31250.00                                                              | Solvent                | CHLOROFORM-d | Spectrum Offset (Hz) | 12571.3047 |
| Spectrum Type          | STANDARD             | Sweep Width (Hz)  | 31249.05                                                              | Temperature (degree C) | 24.970       |                      |            |

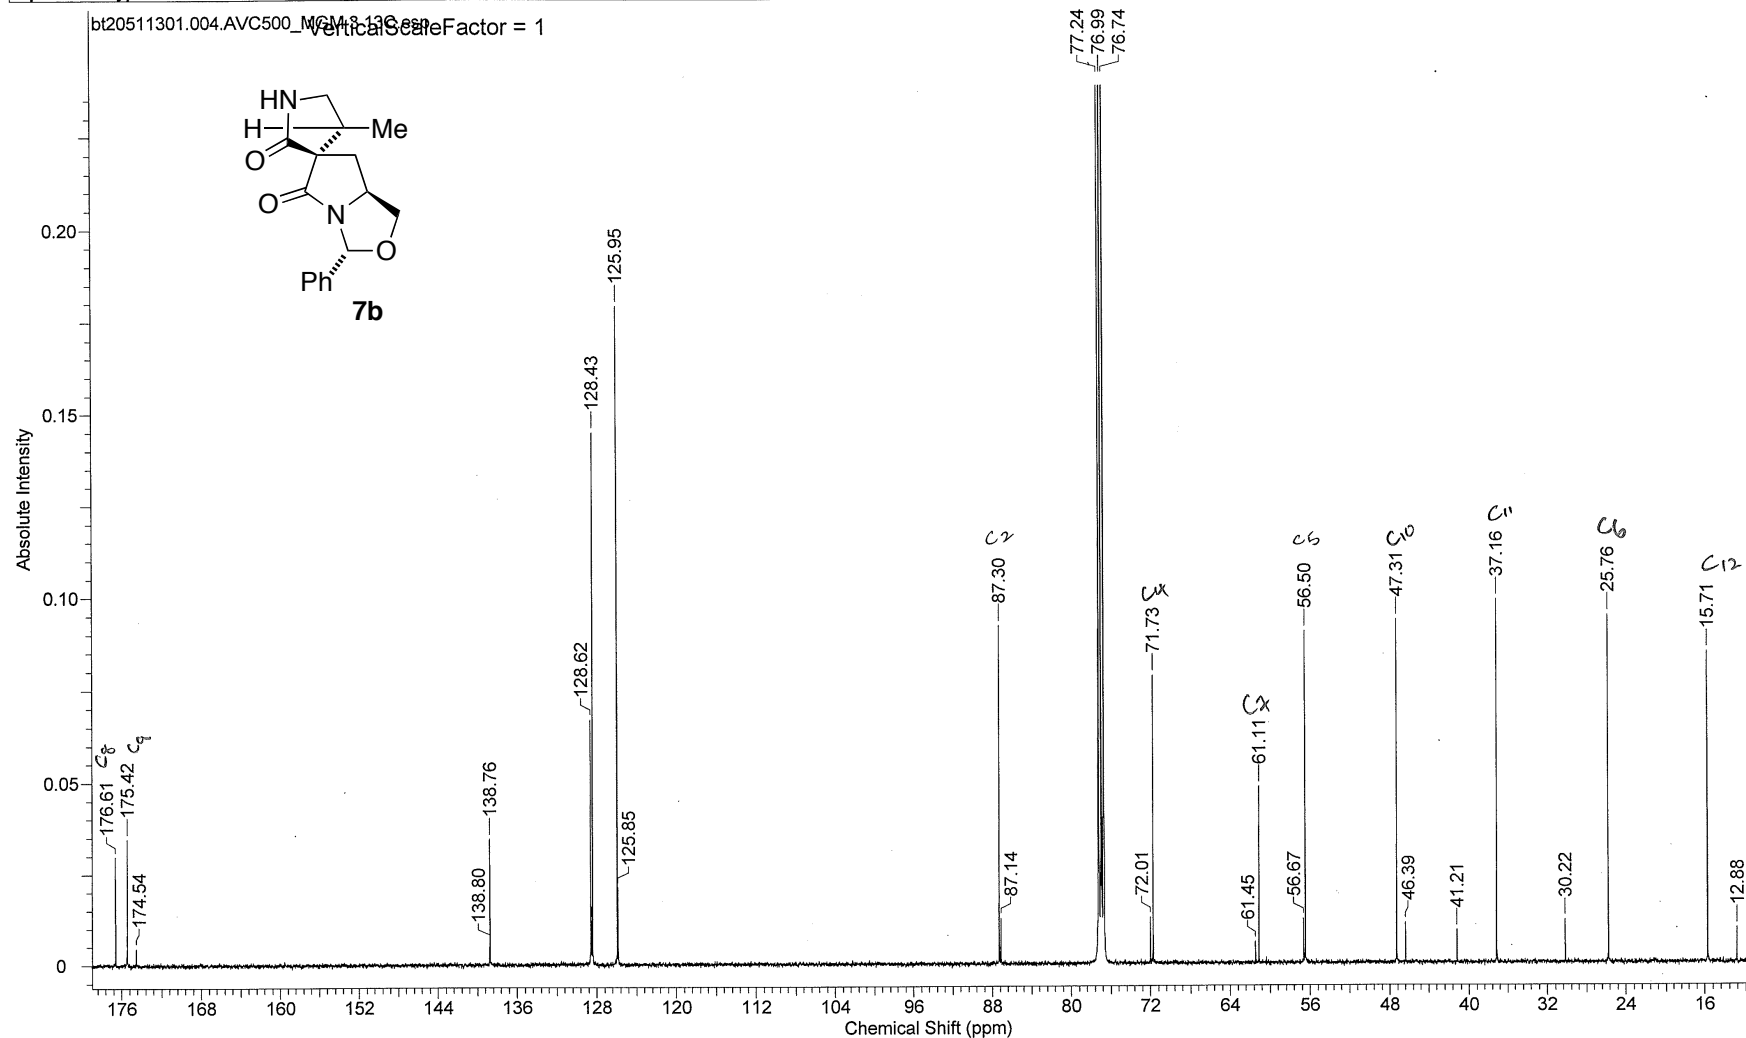

|                        |                      |                   |                                                                       |                        |                      |
|------------------------|----------------------|-------------------|-----------------------------------------------------------------------|------------------------|----------------------|
| Acquisition Time (sec) | 1.0486               | Comment           | Instrument AVC500 Group MGM 1996 Benjamin Tan 11/11/11                | Date                   | 11 Jan 2011 22:26:08 |
| Date Stamp             | 11 Jan 2011 22:26:08 | File Name         | C:\Documents and Settings\mgmgroup\CHEM\Desktop\bt19961101\4\data1\1r | Origin                 | avc500               |
| Frequency (MHz)        | 125.80               | Nucleus           | 13C                                                                   | Number of Transients   | 1024                 |
| Original Points Count  | 32768                | Owner             | dp-nmrgroup                                                           | Points Count           | 32768                |
| Receiver Gain          | 1820.00              | SW(cyclical) (Hz) | 31250.00                                                              | Solvent                | CHLOROFORM-d         |
| Spectrum Type          | STANDARD             | Sweep Width (Hz)  | 31249.05                                                              | Temperature (degree C) | 24.970               |
|                        |                      |                   |                                                                       | Spectrum Offset (Hz)   | 12571.3047           |

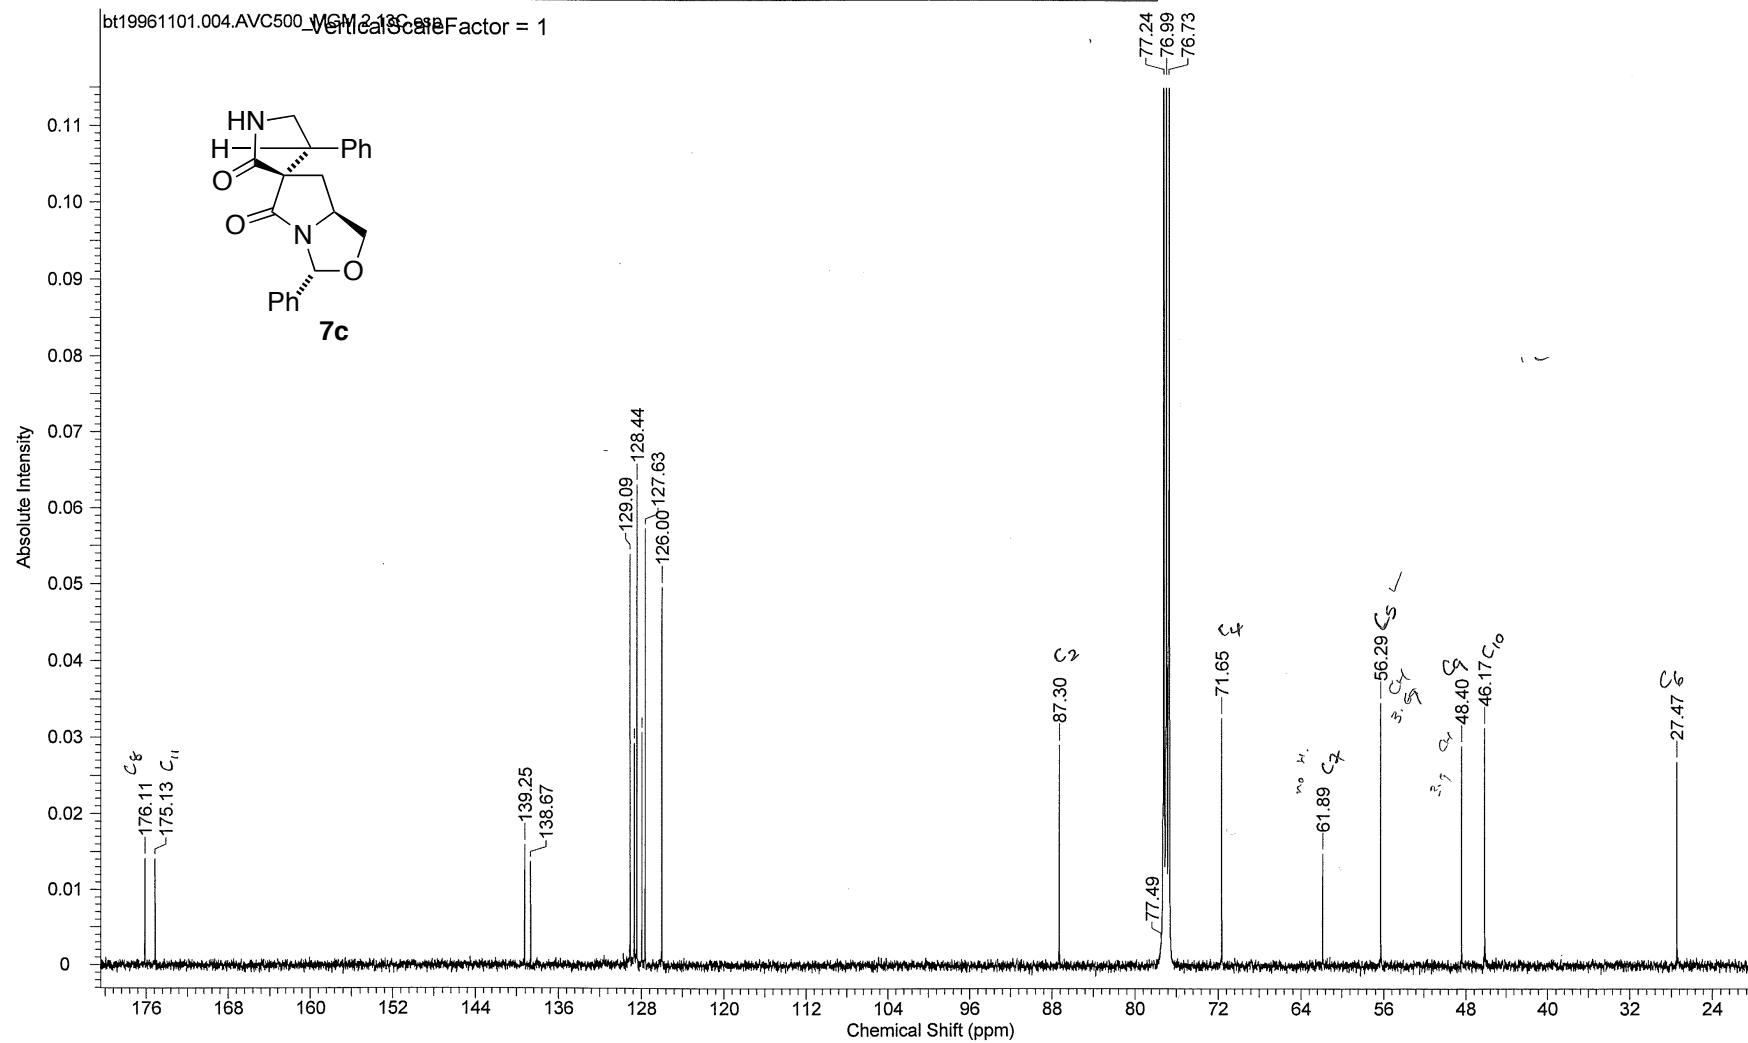







Instrument DQX400  
 Chemist RDS  
 Group MGM  
 RS01-5(1SPOT)  
 c13acq.au CDC13 e:\ mgmgrp 55

NMR@CHEM.OX

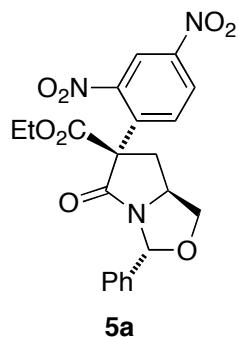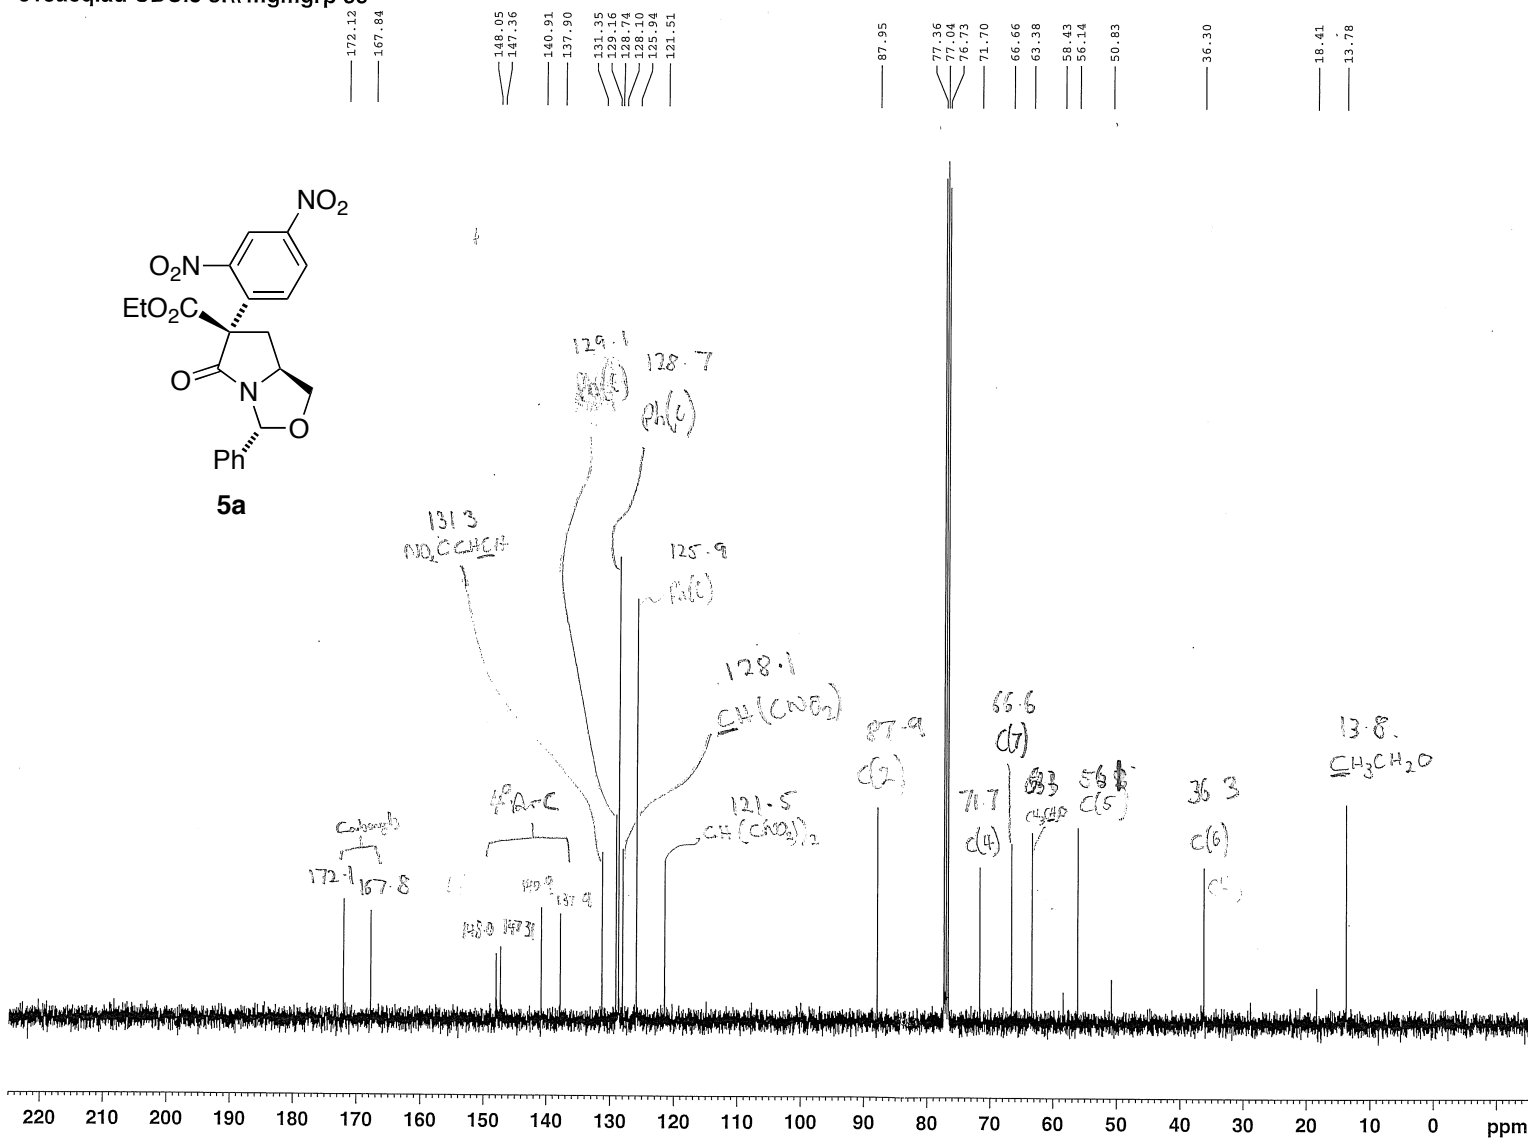

Current Data Parameters  
 NAME Oct26-2006-55  
 EXPNO 2  
 PROCNO 1

F2 - Acquisition Parameters  
 Date\_ 20061026  
 Time 20.36  
 INSTRUM av400  
 PROBHD 5 mm QNP 1H/13  
 PULPROG zgpg30  
 TD 65536  
 SOLVENT CDC13  
 NS 256  
 DS 4  
 SWH 26178.010 Hz  
 FIDRES 0.399445 Hz  
 AQ 1.2517875 sec  
 RG 32768  
 DW 19.100 usec  
 DE 7.50 usec  
 TE 296.5 K  
 D1 2.0000000 sec  
 d11 0.0300000 sec  
 DELTA 1.89999998 sec  
 MCREST 0.00000000 sec  
 MCWRK 0.01500000 sec

==== CHANNEL f1 =====  
 NUC1 13C  
 P1 9.50 usec  
 PL1 0.00 dB  
 SFO1 100.6403931 MHz

==== CHANNEL f2 =====  
 CPDPRG2 waltz16  
 NUC2 1H  
 PCPD2 80.00 usec  
 PL2 0.00 dB  
 PL12 19.00 dB  
 PL13 25.00 dB  
 SFO2 400.2016008 MHz

F2 - Processing parameters  
 SI 32768  
 SF 100.6303718 MHz  
 WDW EM  
 SSB 0  
 LB 1.00 Hz  
 GB 0  
 PC 1.40

Instrument DQX400  
 Chemist RDS  
 Group MGM  
 RS01-9(TS) 7  
 h1acq.au CDCI3 e:\mgmgrp 11

NMR@CHEM.OX

Current Data Parameters  
 NAME Nov20-2006-11  
 EXPNO 1  
 PROCNO 1

F2 - Acquisition Parameters  
 Date\_ 20061121  
 Time 17.42  
 INSTRUM av400  
 PROBHD 5 mm QNP 1H/13  
 PULPROG zg60  
 TD 65536  
 SOLVENT CDCI3  
 NS 16  
 DS 2  
 SWH 8278.146 Hz  
 FIDRES 0.126314 Hz  
 AQ 3.9584243 sec  
 RG 35.9  
 DW 60.400 usec  
 DE 7.50 usec  
 TE 295.7 K  
 DI 1.00000000 sec

==== CHANNEL f1 =====  
 NUC1 1H  
 P1 9.00 usec  
 PL1 0.00 dB  
 SFO1 400.2024714 MHz

F2 - Processing parameters  
 SI 32768  
 SF 400.200028 MHz  
 WDW EM  
 SSB 0  
 LB 0.30 Hz  
 GB 0  
 PC 1.00

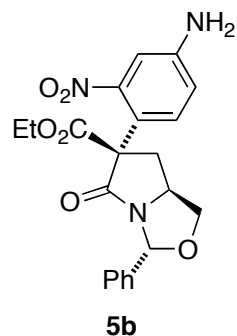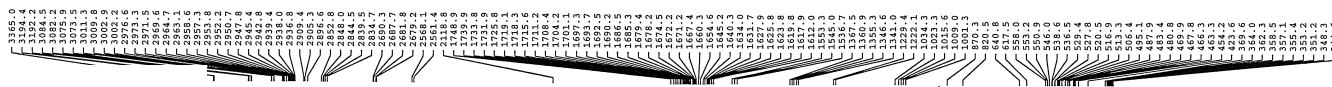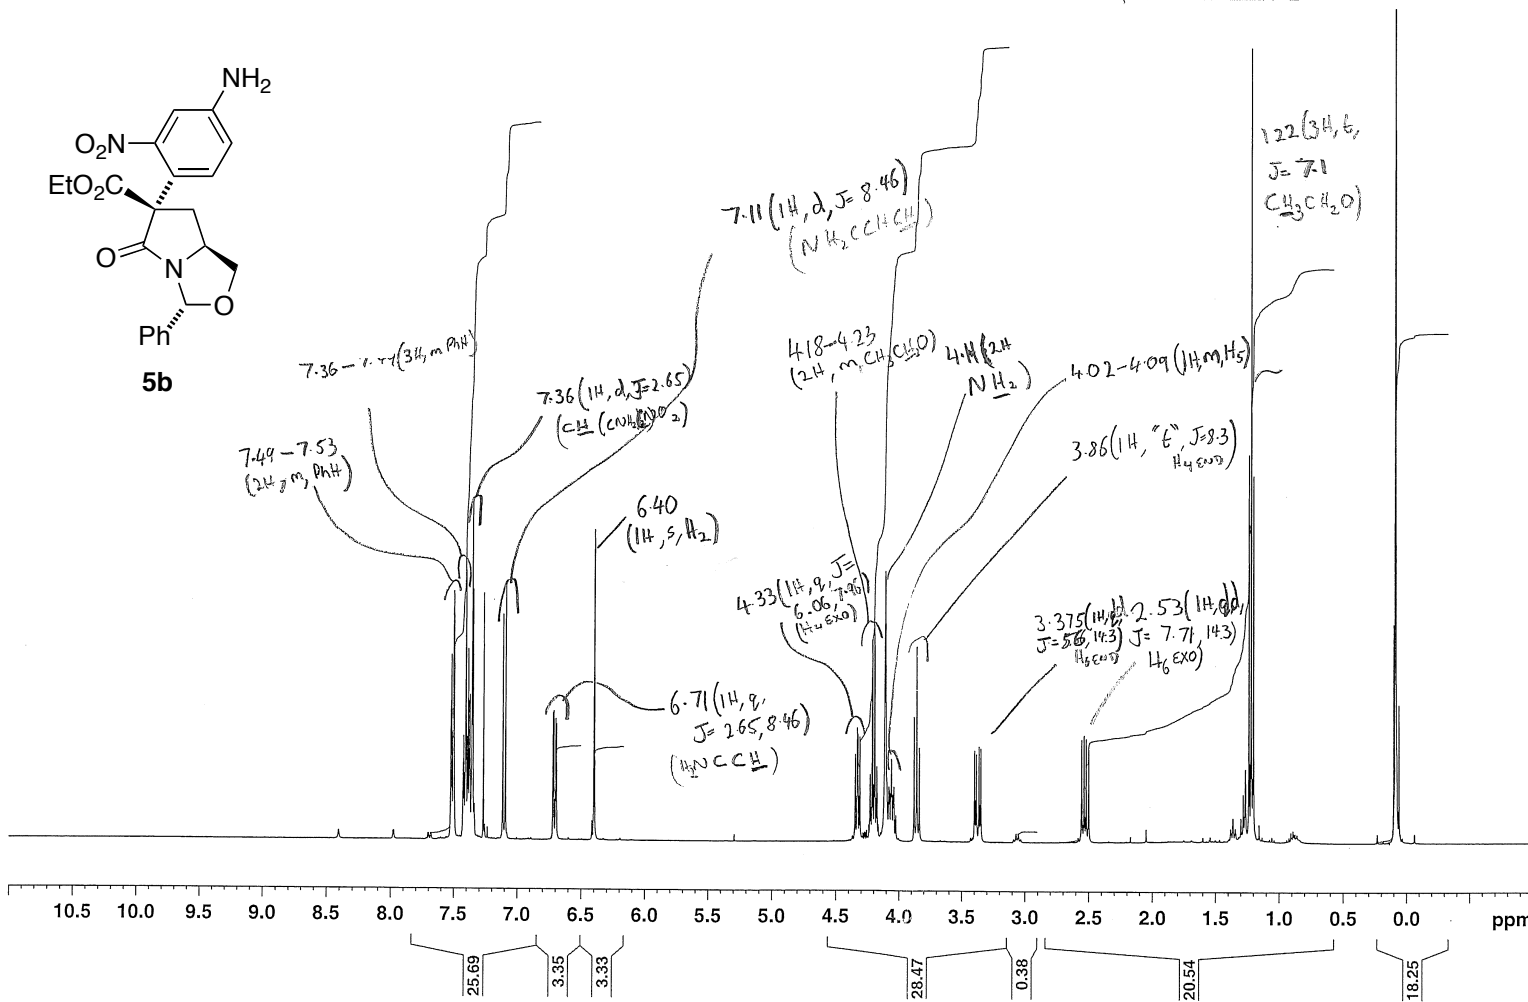

Instrument DQX400  
 Chemist RDS  
 Group MGM  
 RS01-9(TS) 7  
 c13acq.au CDCI3 e:\\ mgmgrp 11

NMR@CHEM.OX

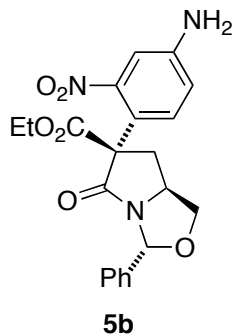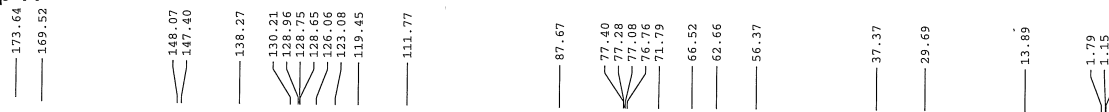

Current Data Parameters  
 NAME Nov20-2006-11  
 EXPNO 2  
 PROCNO 1

F2 - Acquisition Parameters  
 Date\_ 20061121  
 Time 17.57  
 INSTRUM av400  
 PROBHD 5 mm QNP 1H/13  
 PULPROG zgpg30  
 TD 65536  
 SOLVENT CDCl3  
 NS 256  
 DS 4  
 SWH 26178.010 Hz  
 FIDRES 0.399445 Hz  
 AQ 1.2517875 sec  
 RG 32768  
 DW 19.100 usec  
 DE 7.50 usec  
 TE 296.0 K  
 D1 2.0000000 sec  
 d11 0.0300000 sec  
 DELTA 1.89999998 sec  
 MCREST 0.0000000 sec  
 MCWRK 0.01500000 sec

==== CHANNEL f1 =====  
 NUC1 13C  
 P1 9.50 usec  
 PL1 0.00 dB  
 SFO1 100.6403931 MHz

==== CHANNEL f2 =====  
 CPDPRG2 waltz16  
 NUC2 1H  
 PCPD2 80.00 usec  
 PL2 0.00 dB  
 PL12 19.00 dB  
 PL13 25.00 dB  
 SFO2 400.2016008 MHz

F2 - Processing parameters  
 SI 32768  
 SF 100.6303718 MHz  
 WDW EM  
 SSB 0  
 LB 1.00 Hz  
 GB 0  
 PC 1.40

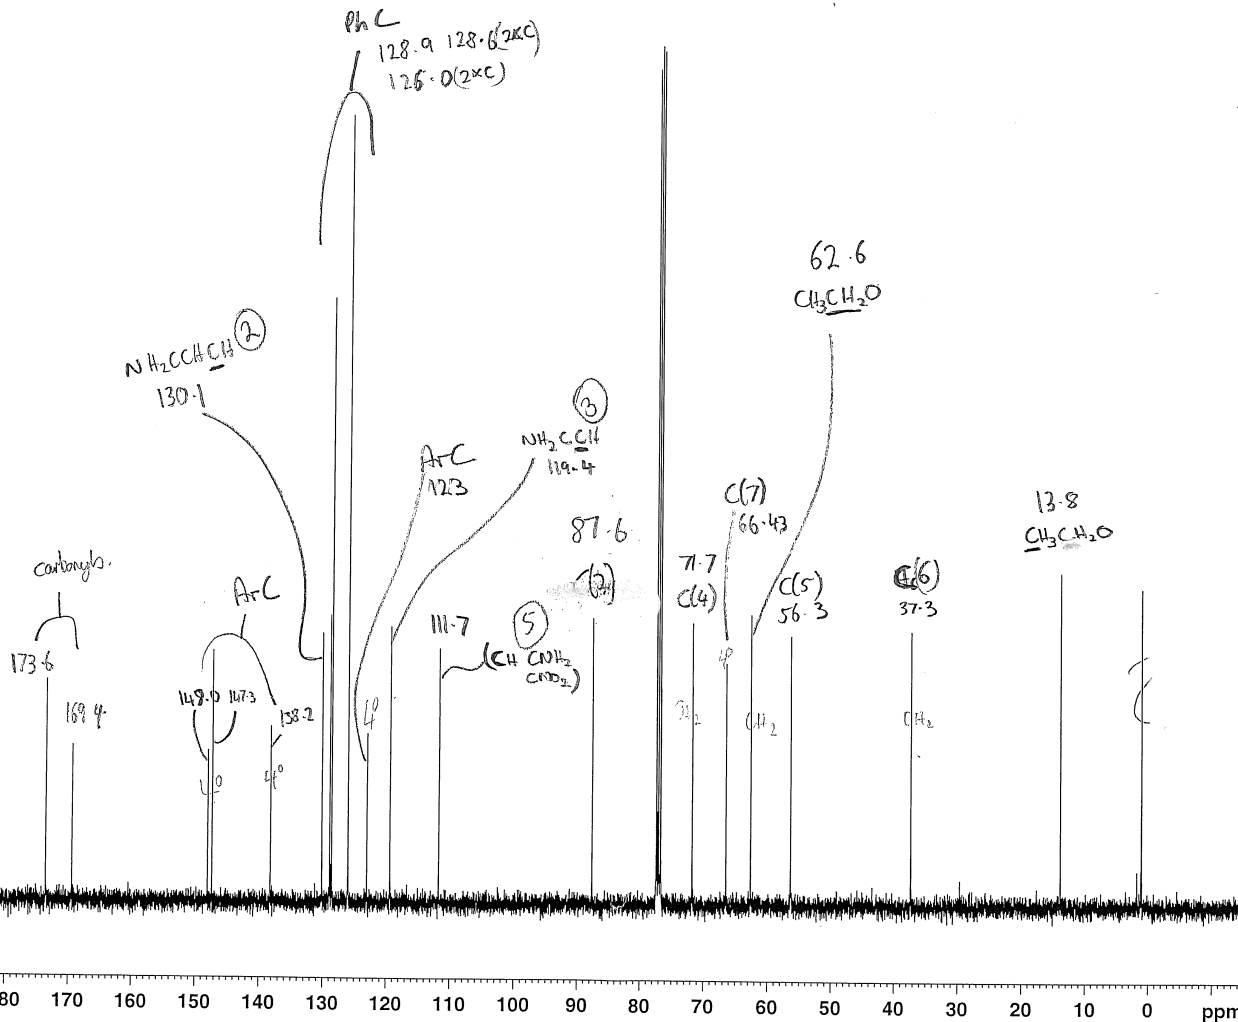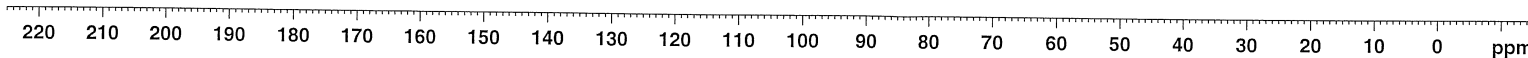

Instrument DQX400  
 Chemist RDS  
 Group MGM  
 RSByCy  
 h1acq.au CDCI3 e:\ mngmgrp 54

NMR@CHEM.OX

Current Data Parameters  
 NAME Apr03-2007-54  
 EXPNO 1  
 PROCNO 1

F2 - Acquisition Parameters  
 Date\_ 20070404  
 Time 16.06  
 INSTRUM av400  
 PROBHD 5 mm QNP 1H/13  
 PULPROG zg60  
 TD 65536  
 SOLVENT CDCl3  
 NS 16  
 DS 2  
 SWH 8278.146 Hz  
 FIDRES 0.126314 Hz  
 AQ 3.9584243 sec  
 RG 362  
 DW 60.400 usec  
 DE 7.50 usec  
 TE 294.5 K  
 D1 1.00000000 sec

==== CHANNEL f1 =====  
 NUC1 1H  
 P1 9.00 usec  
 PL1 0.00 dB  
 SFO1 400.2024714 MHz

F2 - Processing parameters  
 SI 32768  
 SF 400.2000028 MHz  
 WDW EM  
 SSB 0  
 LB 0.30 Hz  
 GB 0  
 FC 1.00

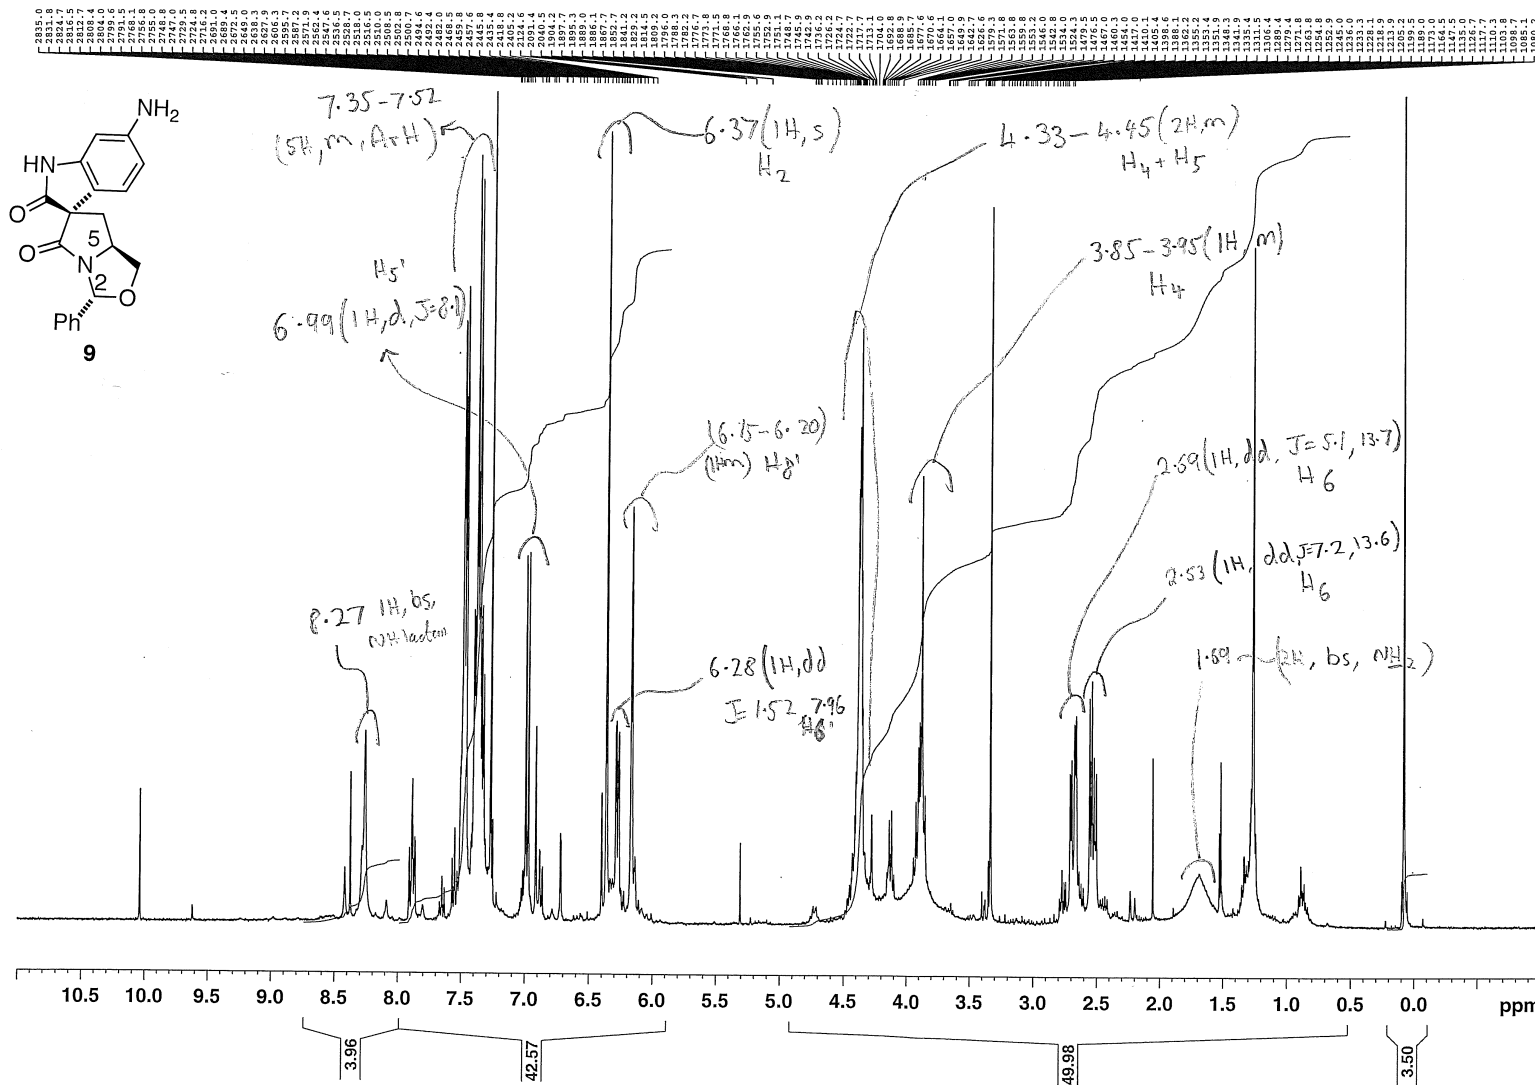

Instrument DQX400  
Chemist RDS  
Group MGM  
RSByCy  
c13dept135.au CDC13 e:\ mgmgrp 54

NMR@CHEM.OX

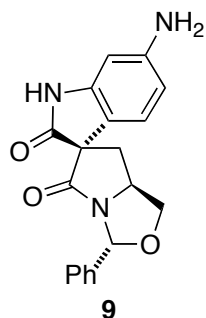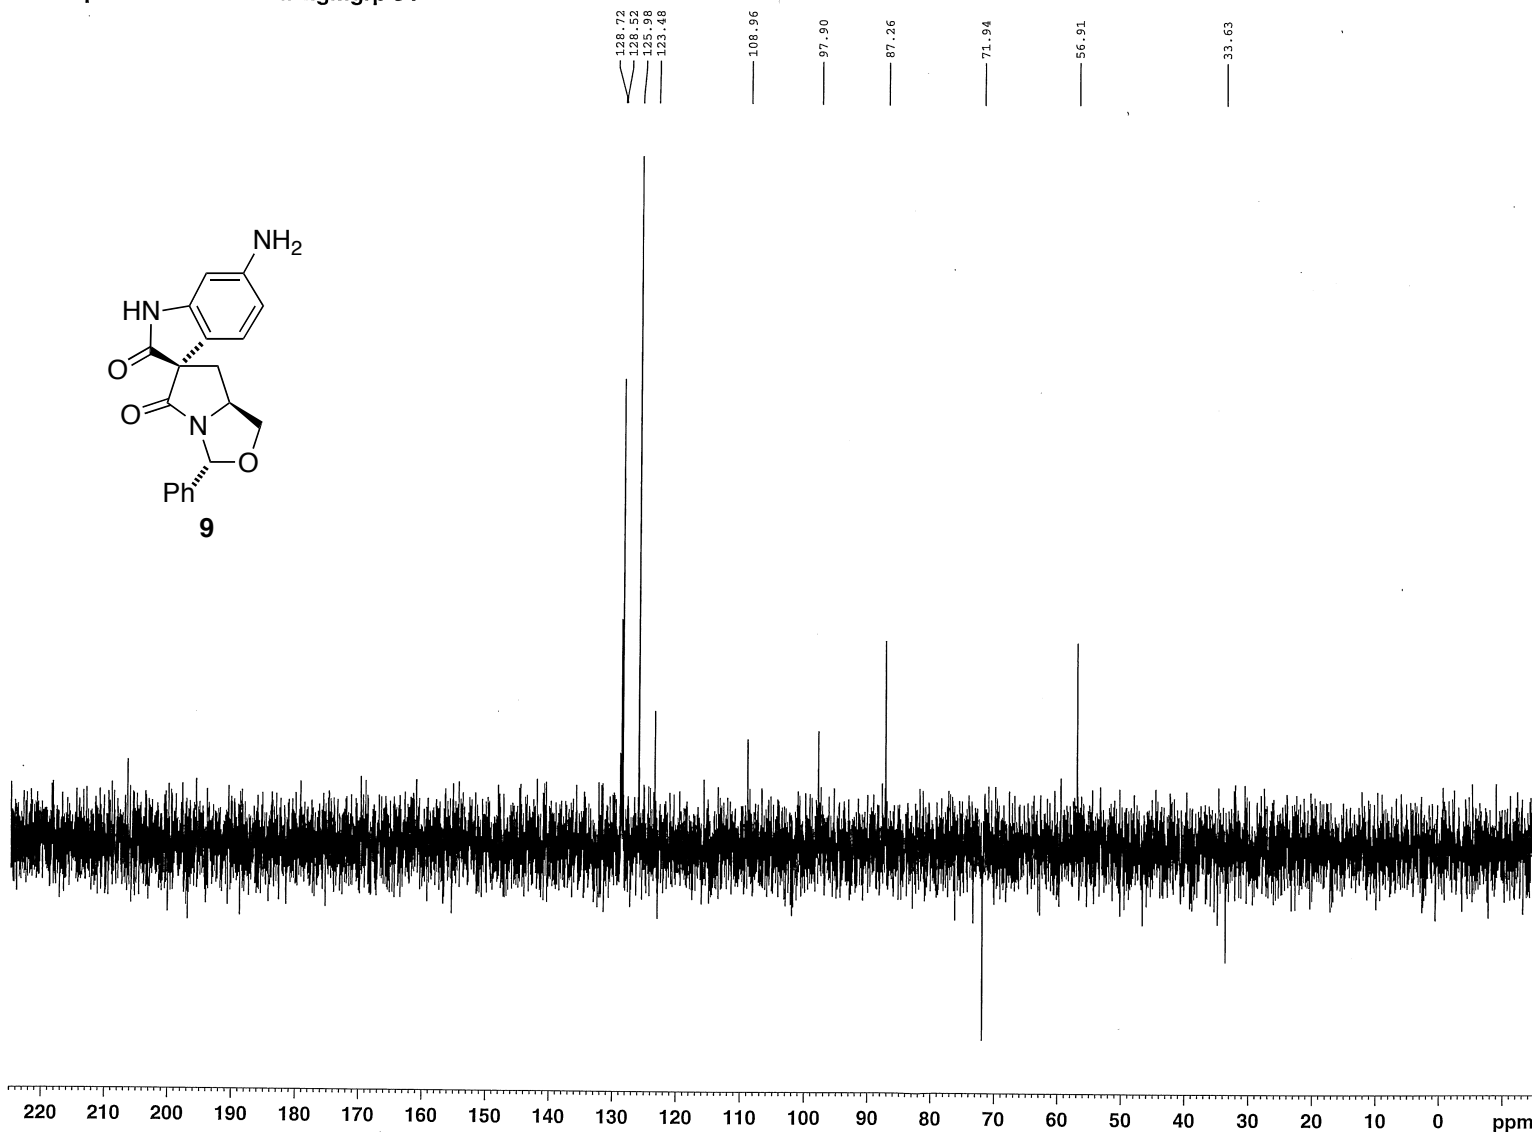

Current Data Parameters  
NAME Apr03-2007-54  
EXPNO 3  
PROCNO 1

F2 - Acquisition Parameters  
Date\_ 20070404  
Time 16.36  
INSTRUM av400  
PROBHD 5 mm QNP 1H/13  
PULPROG dept135  
TD 65536  
SOLVENT CDC13  
NS 256  
DS 4  
SWH 26178.010 Hz  
FIDRES 0.399445 Hz  
AQ 1.2517875 sec  
RG 32768  
DW 19.100 usec  
DE 7.50 usec  
TE 295.0 K  
CNST2 145.000000  
D1 2.00000000 sec  
d2 0.00344828 sec  
d12 0.00002000 sec  
DELTA 0.00001210 sec  
MCREST 0.00000000 sec  
MCWRK 0.01500000 sec

===== CHANNEL f1 =====  
NUC1 13C  
P1 9.50 usec  
p2 19.00 usec  
PL1 0.00 dB  
SFO1 100.6403931 MHz

===== CHANNEL f2 =====  
CPDPRG2 waltz16  
NUC2 1H  
P3 9.00 usec  
p4 18.00 usec  
PCPD2 80.00 usec  
PL2 0.00 dB  
PL12 19.00 dB  
SFO2 400.2016008 MHz

F2 - Processing parameters  
SI 32768  
SF 100.6303718 MHz  
WDW EM  
SSB 0  
LB 1.00 Hz  
GB 0  
PC 1.40

Instrument DQX400  
 Chemist RDS  
 Group MGM  
 RS01-10b  
 h1acq.au CDCl3 e:\mgmgrp 18

$$\alpha_D^{22} = -38.4 \quad c = 1 \text{ in DCM}$$

NMR@CHEM.OX

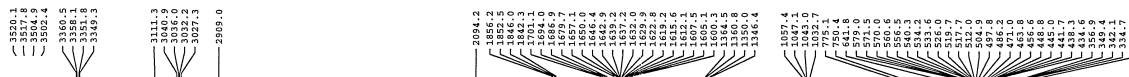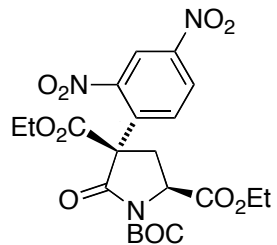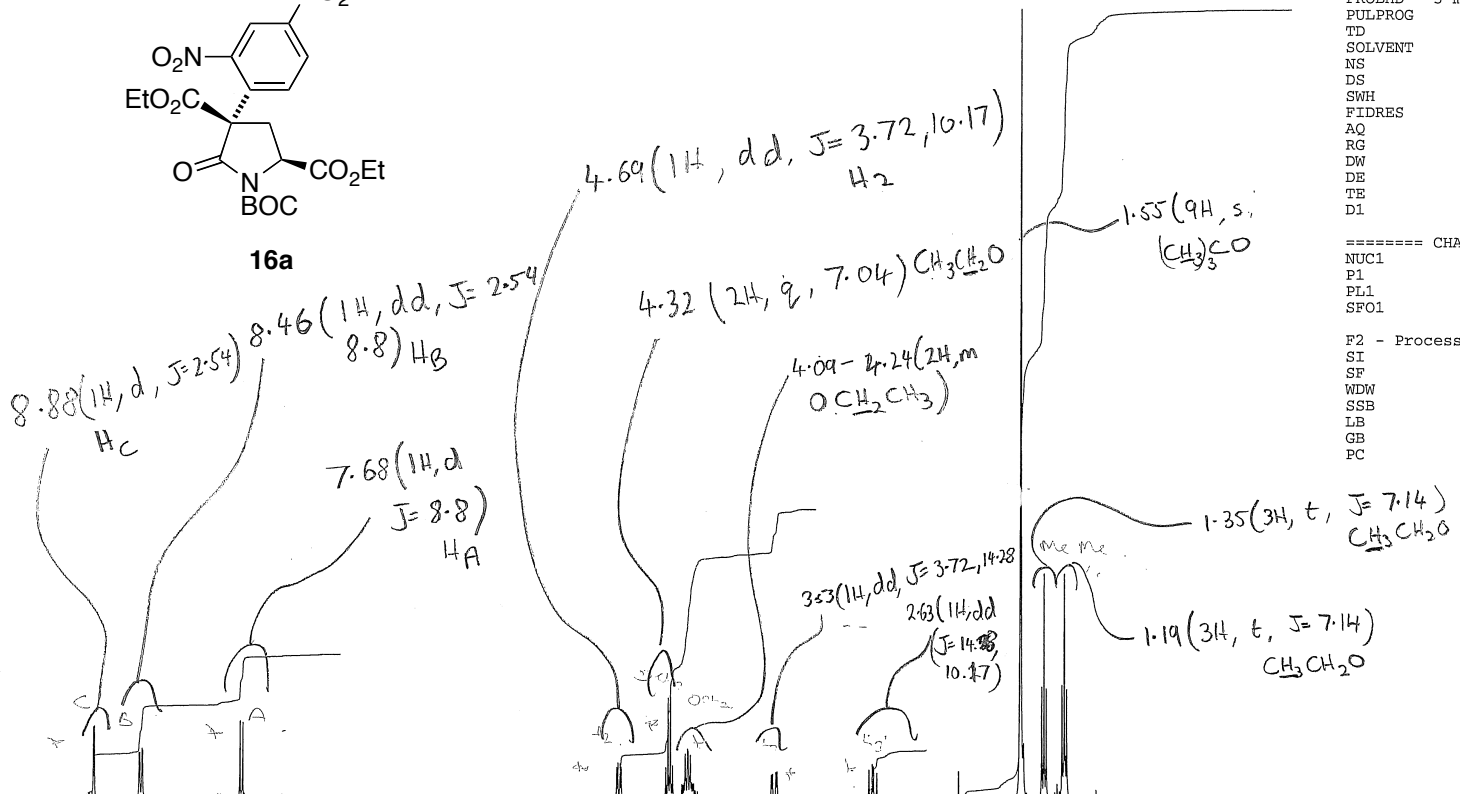

Current Data Parameters  
 NAME Jan10-2007-18  
 EXPNO 1  
 PROCNO 1

F2 - Acquisition Parameters  
 Date\_ 20070110  
 Time 12.41  
 INSTRUM av400  
 PROBHD 5 mm QNP 1H/13  
 PULPROG zg60  
 TD 65536  
 SOLVENT CDCl3  
 NS 16  
 DS 2  
 SWH 8278.146 Hz  
 FIDRES 0.126314 Hz  
 AQ 3.9584243 sec  
 RG 14.3  
 DW 60.400 usec  
 DE 7.50 usec  
 TE 295.6 K  
 D1 1.00000000 sec

==== CHANNEL f1 =====  
 NUC1 1H  
 P1 9.00 usec  
 PL1 0.00 dB  
 SFO1 400.2024714 MHz

F2 - Processing parameters  
 SI 32768  
 SF 400.2000028 MHz  
 WDW EM  
 SSB 0  
 LB 0.30 Hz  
 GB 0  
 PC 1.00

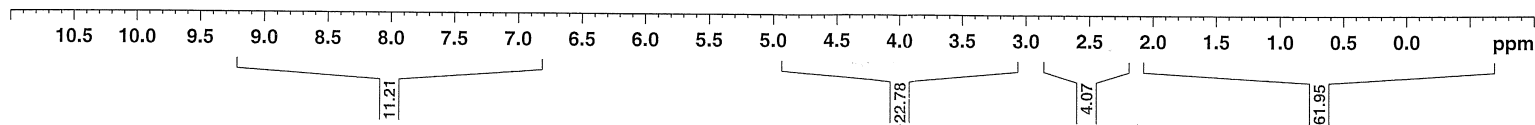



Instrument DQX400  
 Chemist RDS  
 Group MGM  
 RS01-10  
 c13acq.au CDCI3 e:\mgmgrp 18

NMR@CHEM.OX

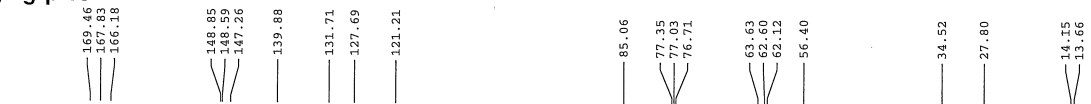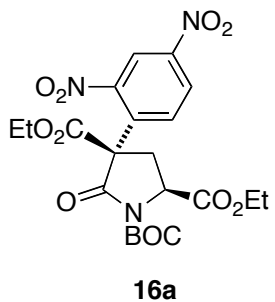

Current Data Parameters  
 NAME Dec12-2006-18  
 EXPNO 2  
 PROCNO 1

F2 - Acquisition Parameters  
 Date\_ 20061213  
 Time 17.40  
 INSTRUM av400  
 PROBHD 5 mm QNP 1H/13  
 PULPROG zgpg30  
 TD 65536  
 SOLVENT CDCl3  
 NS 256  
 DS 4  
 SWH 26178.010 Hz  
 FIDRES 0.399445 Hz  
 AQ 1.2517875 sec  
 RG 32768  
 DW 19.100 usec  
 DE 7.50 usec  
 TE 296.1 K  
 D1 2.0000000 sec  
 d11 0.0300000 sec  
 DELTA 1.89999998 sec  
 MCREST 0.0000000 sec  
 MCWRK 0.0150000 sec

==== CHANNEL f1 =====  
 NUC1 13C  
 P1 9.50 usec  
 PL1 0.00 dB  
 SFO1 100.6403931 MHz

==== CHANNEL f2 =====  
 CPDPRG2 waltz16  
 NUC2 1H  
 PCPD2 80.00 usec  
 PL2 0.00 dB  
 PL12 19.00 dB  
 PL13 25.00 dB  
 SFO2 400.2016008 MHz

F2 - Processing parameters  
 SI 32768  
 SF 100.6303718 MHz  
 WDW EM  
 SSB 0  
 LB 1.00 Hz  
 GB 0  
 PC 1.40

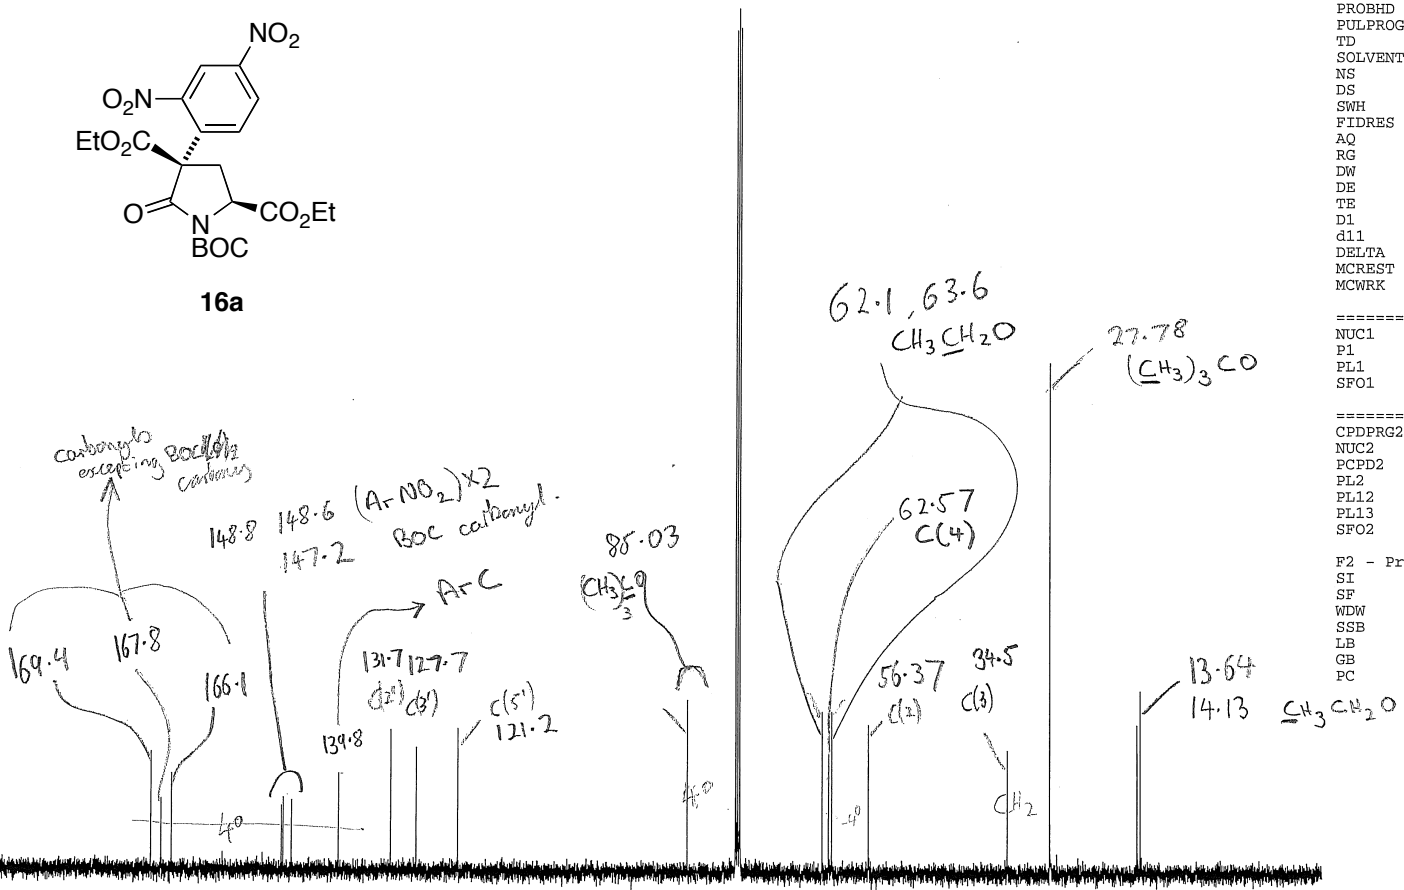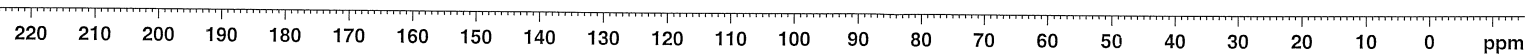

Instrument DQX400  
 Chemist RDS  
 Group MGM  
 RS01-1118 21  
 h1acq.au CDCI3 e:\mngmgrp 13

NMR@CHEM.OX

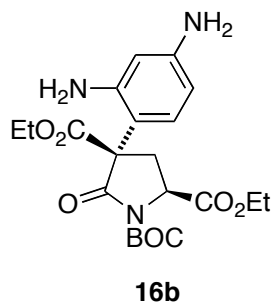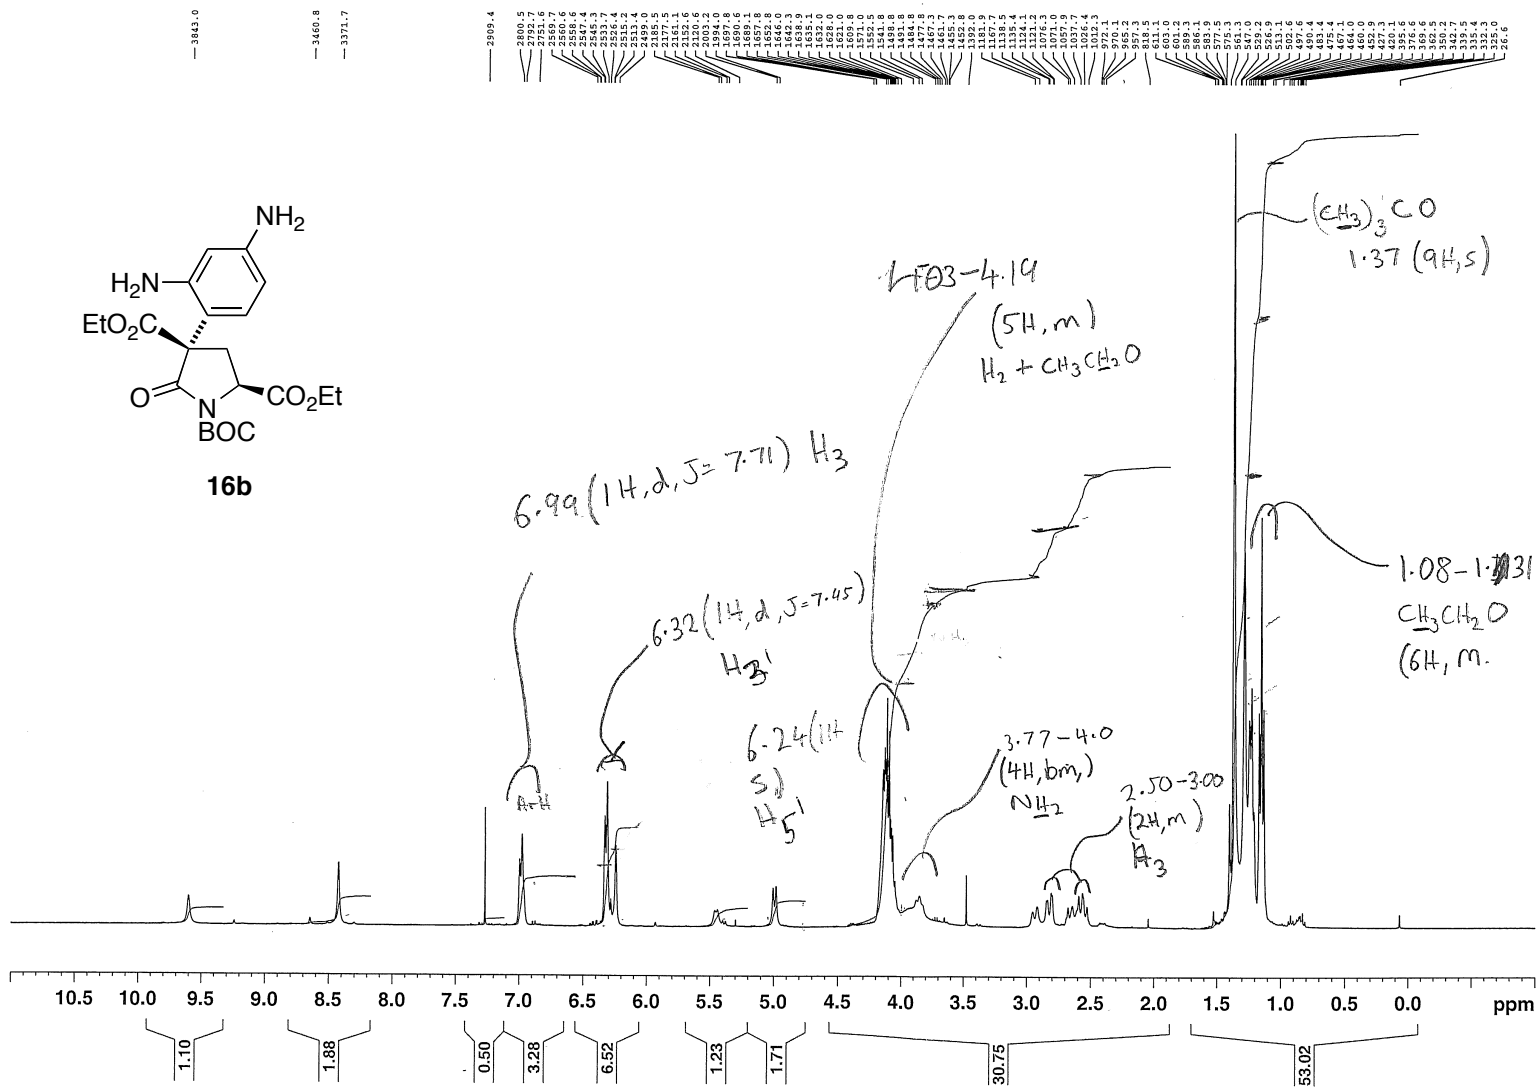

Current Data Parameters  
 NAME Jan29-2007-13  
 EXPNO 1  
 PROCNO 1

F2 - Acquisition Parameters  
 Date\_ 20070129  
 Time 15.14  
 INSTRUM av400  
 PROBHD 5 mm QNP 1H/13  
 PULPROG zg60  
 TD 65536  
 SOLVENT CDCI3  
 NS 16  
 DS 2  
 SWH 8278.146 Hz  
 FIDRES 0.126314 Hz  
 AQ 3.9584243 sec  
 RG 90.5  
 DW 60.400 usec  
 DE 7.50 usec  
 TE 295.3 K  
 D1 1.00000000 sec

==== CHANNEL f1 =====  
 NUC1 1H  
 P1 9.00 usec  
 PL1 0.00 dB  
 SFO1 400.2024714 MHz

F2 - Processing parameters  
 SI 32768  
 SF 400.2000028 MHz  
 WDW EM  
 SSB 0  
 LB 0.30 Hz  
 GB 0  
 PC 1.00

Instrument DQX400  
 Chemist RDS  
 Group MGM  
 RS01-11B  
 c13acq.au CDCI3 e:\m gmgrp 13

NMR@CHEM.OX

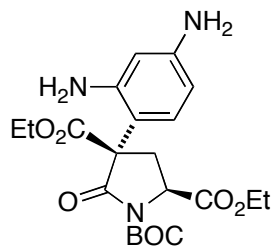

16b

Current Data Parameters  
 NAME Jan29-2007-13  
 EXPNO 2  
 PROCNO 1

F2 - Acquisition Parameters  
 Date\_ 20070129  
 Time\_ 15.29  
 INSTRUM av400  
 PROBHD 5 mm QNP 1H/13  
 PULPROG zgpg30  
 TD 65536  
 SOLVENT CDCI3  
 NS 256  
 DS 4  
 SWH 26178.010 Hz  
 FIDRES 0.399445 Hz  
 AQ 1.2517875 sec  
 RG 32768  
 DW 19.100 usec  
 DE 7.50 usec  
 TE 295.7 K  
 D1 2.0000000 sec  
 d11 0.0300000 sec  
 DELTA 1.89999998 sec  
 MCREST 0.00000000 sec  
 MCWRK 0.01500000 sec

==== CHANNEL f1 =====  
 NUC1 13C  
 P1 9.50 usec  
 PL1 0.00 dB  
 SFO1 100.6403931 MHz

==== CHANNEL f2 =====  
 CPDPRG2 waltz16  
 NUC2 1H  
 PCPD2 80.00 usec  
 PL2 0.00 dB  
 PL12 19.00 dB  
 PL13 25.00 dB  
 SFO2 400.2016008 MHz

F2 - Processing parameters  
 SI 32768  
 SF 100.6303718 MHz  
 WDW EM  
 SSB 0  
 LB 1.00 Hz  
 GB 0  
 PC 1.40

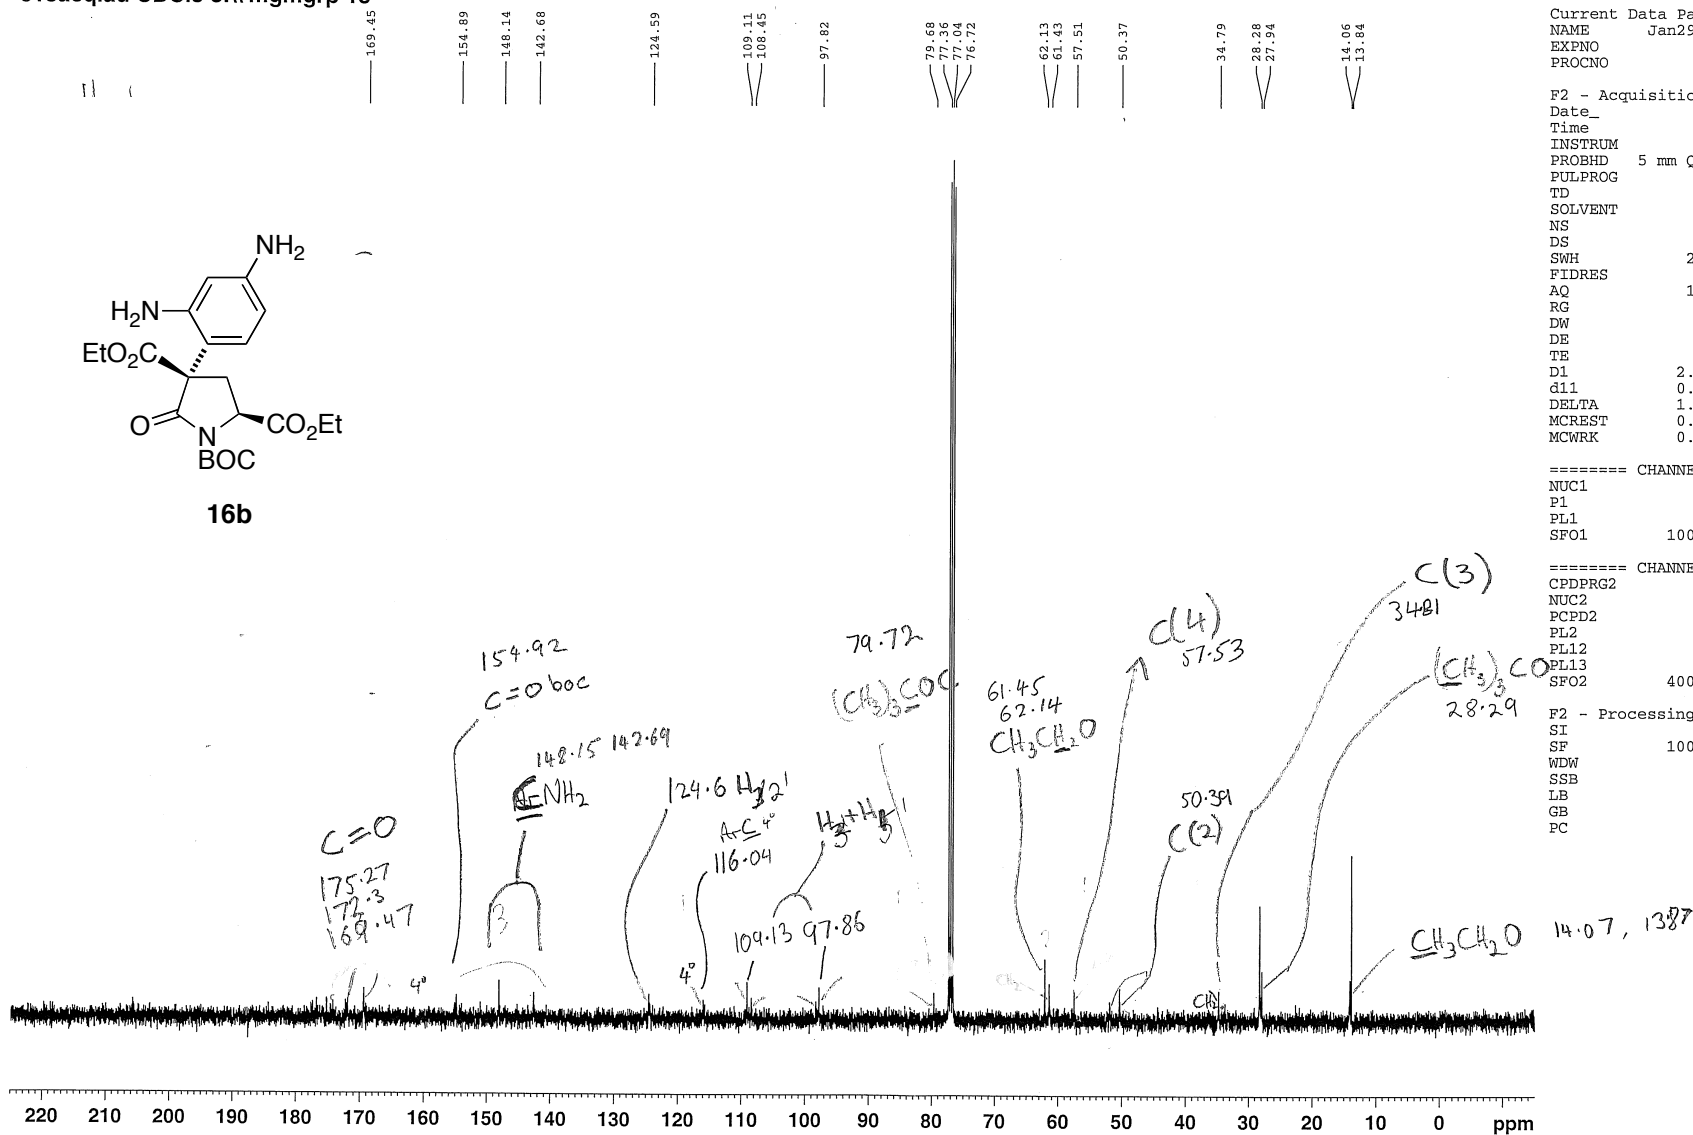

Instrument DQX400  
Chemist RDS  
Group MGM  
RS01-14TS  
h1acq.au CDC13 e:\ mngmgrp 55

NMR@CHEM.OX

DCM

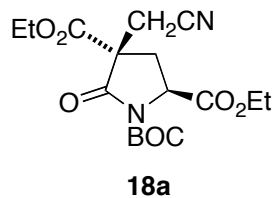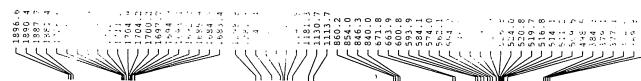

Current Data Parameters  
NAME Mar07-2007-55  
EXPNO 1  
PROCNO 1

F2 - Acquisition Parameters  
Date\_ 20070308  
Time 13.53  
INSTRUM av400  
PROBHD 5 mm QNP 1H/13  
PULPROG zg60  
TD 65536  
SOLVENT CDC13  
NS 16  
DS 2  
SWH 8278.146 Hz  
FIDRES 0.126314 Hz  
AQ 3.9584243 sec  
RG 90.5  
DW 60.400 usec  
DE 7.50 usec  
TE 294.8 K  
D1 1.0000000 sec

==== CHANNEL f1 =====  
NUC1 1H  
P1 9.00 usec  
PL1 0.00 dB  
SFO1 400.2024714 MHz

F2 - Processing parameters  
SI 32768  
SF 400.2000028 MHz  
WDW EM  
SSB 0  
LB 0.30 Hz  
GB 0  
PC 1.00

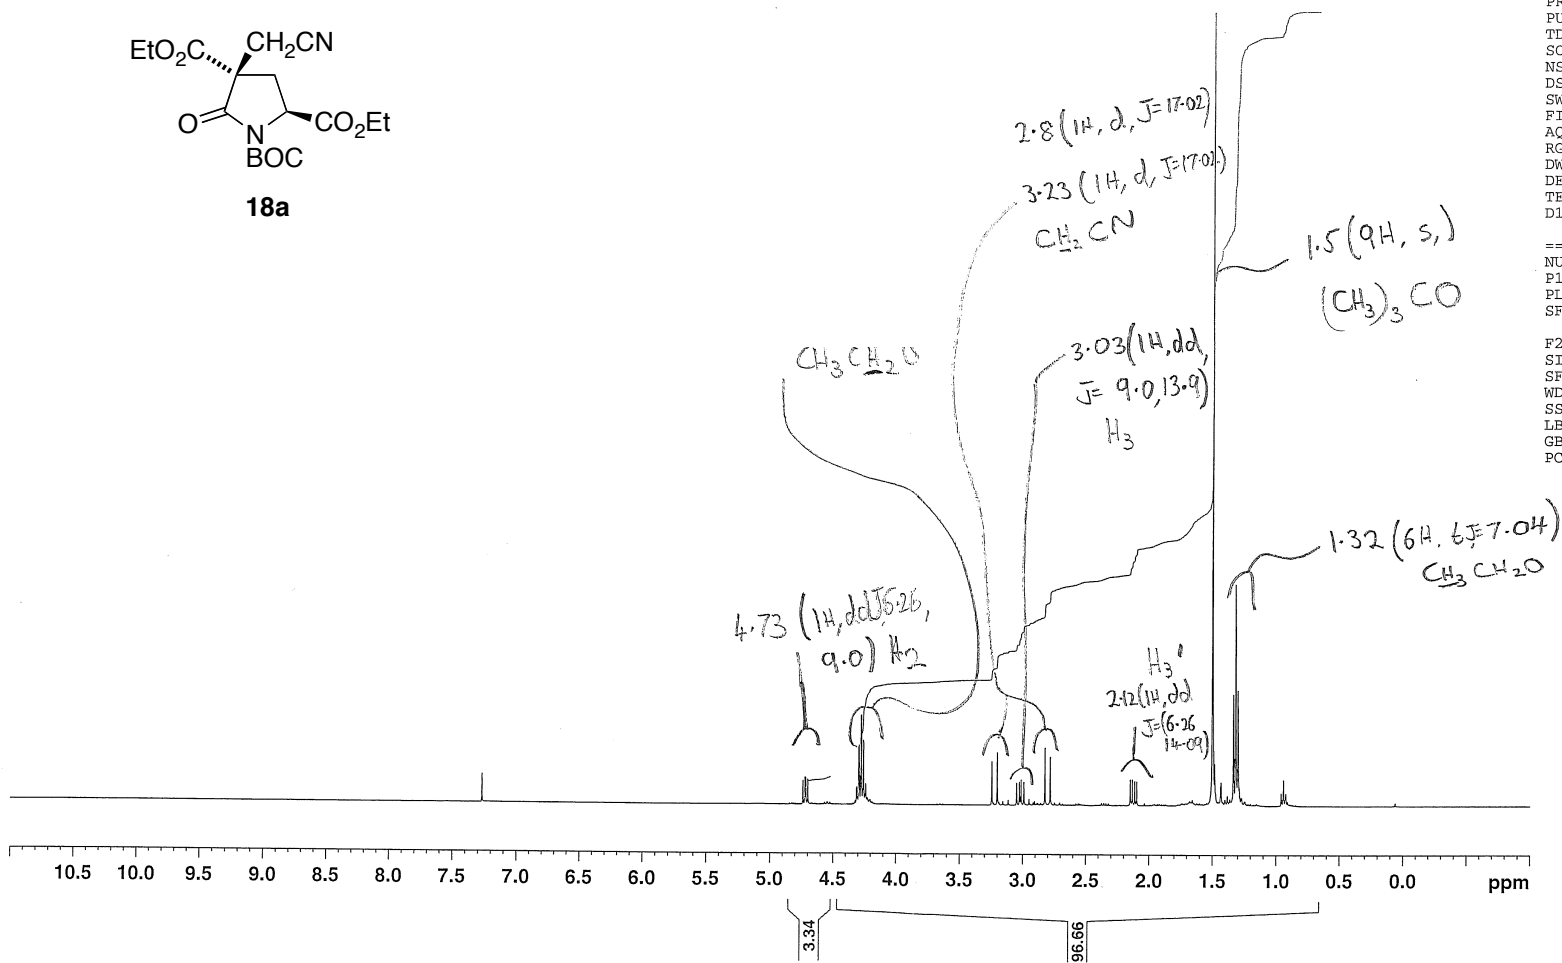

Instrument DQX400  
Chemist RDS  
Group MGM  
RSCN1  
h1acq.au CDCI3 e:\ mgmgrp 25

NMR@CHEM.OX

$c = 0.5$  in DCM  
 $\Delta \nu^{22} = +8.0$

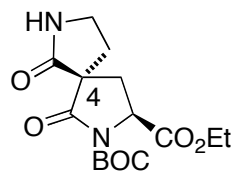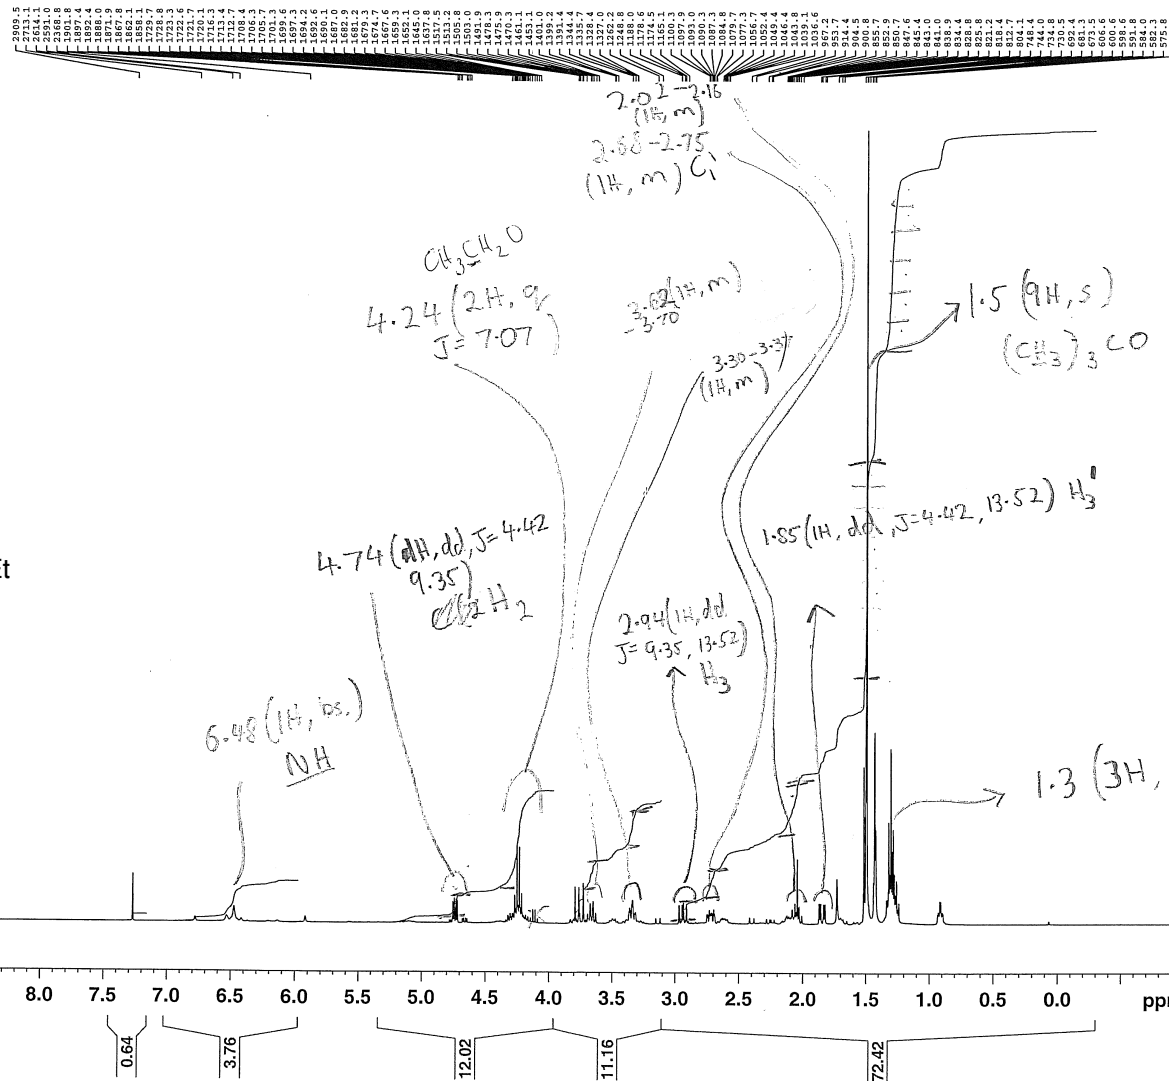

Current Data Parameters  
NAME Apr03-2007-25  
EXPNO 1  
PROCNO 1

F2 - Acquisition Parameters  
Date\_ 20070405  
Time 10.06  
INSTRUM av400  
PROBHD 5 mm QNP 1H/13  
PULPROG zg60  
TD 65536  
SOLVENT CDCl3  
NS 16  
DS 2  
SWH 8278.146 Hz  
FIDRES 0.126314 Hz  
AQ 3.9584243 sec  
RG 143.7  
DW 60.400 usec  
DE 7.50 usec  
TE 295.1 K  
D1 1.00000000 sec

===== CHANNEL f1 =====  
NUC1 1H  
P1 9.00 usec  
PL1 0.00 dB  
SFO1 400.2024714 MHz

F2 - Processing parameters  
SI 32768  
SF 400.2000028 MHz  
WDW EM  
SSB 0  
LB 0.30 Hz  
GB 0  
PC 1.00

Instrument DQX400  
 Chemist RDS  
 Group MGM  
 RSCN1  
 c13acq.au CDC13 e:\ mgmgrp 25

NMR@CHEM.OX

Current Data Parameters  
 NAME Apr03-2007-25  
 EXPNO 2  
 PROCNO 1

F2 - Acquisition Parameters  
 Date\_ 20070405  
 Time 10.21  
 INSTRUM av400  
 PROBHD 5 mm QNP 1H/13  
 PULPROG zgpg30  
 TD 65536  
 SOLVENT CDCl3  
 NS 256  
 DS 4  
 SWH 26178.010 Hz  
 FIDRES 0.399445 Hz  
 AQ 1.2517875 sec  
 RG 32768  
 DW 19.100 usec  
 DE 7.50 usec  
 TE 295.0 K  
 D1 2.00000000 sec  
 d11 0.03000000 sec  
 DELTA 1.89999998 sec  
 MCREST 0.00000000 sec  
 MCWRK 0.01500000 sec

===== CHANNEL f1 =====  
 NUC1 13C  
 P1 9.50 usec  
 PL1 0.00 dB  
 SFO1 100.6403931 MHz

===== CHANNEL f2 =====  
 CPDPRG2 waltz16  
 NUC2 1H  
 FCPD2 80.00 usec  
 PL2 0.00 dB  
 PL12 19.00 dB  
 PL13 25.00 dB  
 SFO2 400.2016008 MHz

F2 - Processing parameters  
 SI 32768  
 SF 100.6303718 MHz  
 WDW EM  
 SSB 0  
 LB 1.00 Hz  
 GB 0  
 PC 1.40

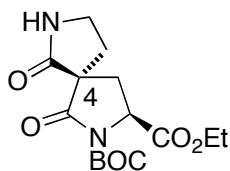

19

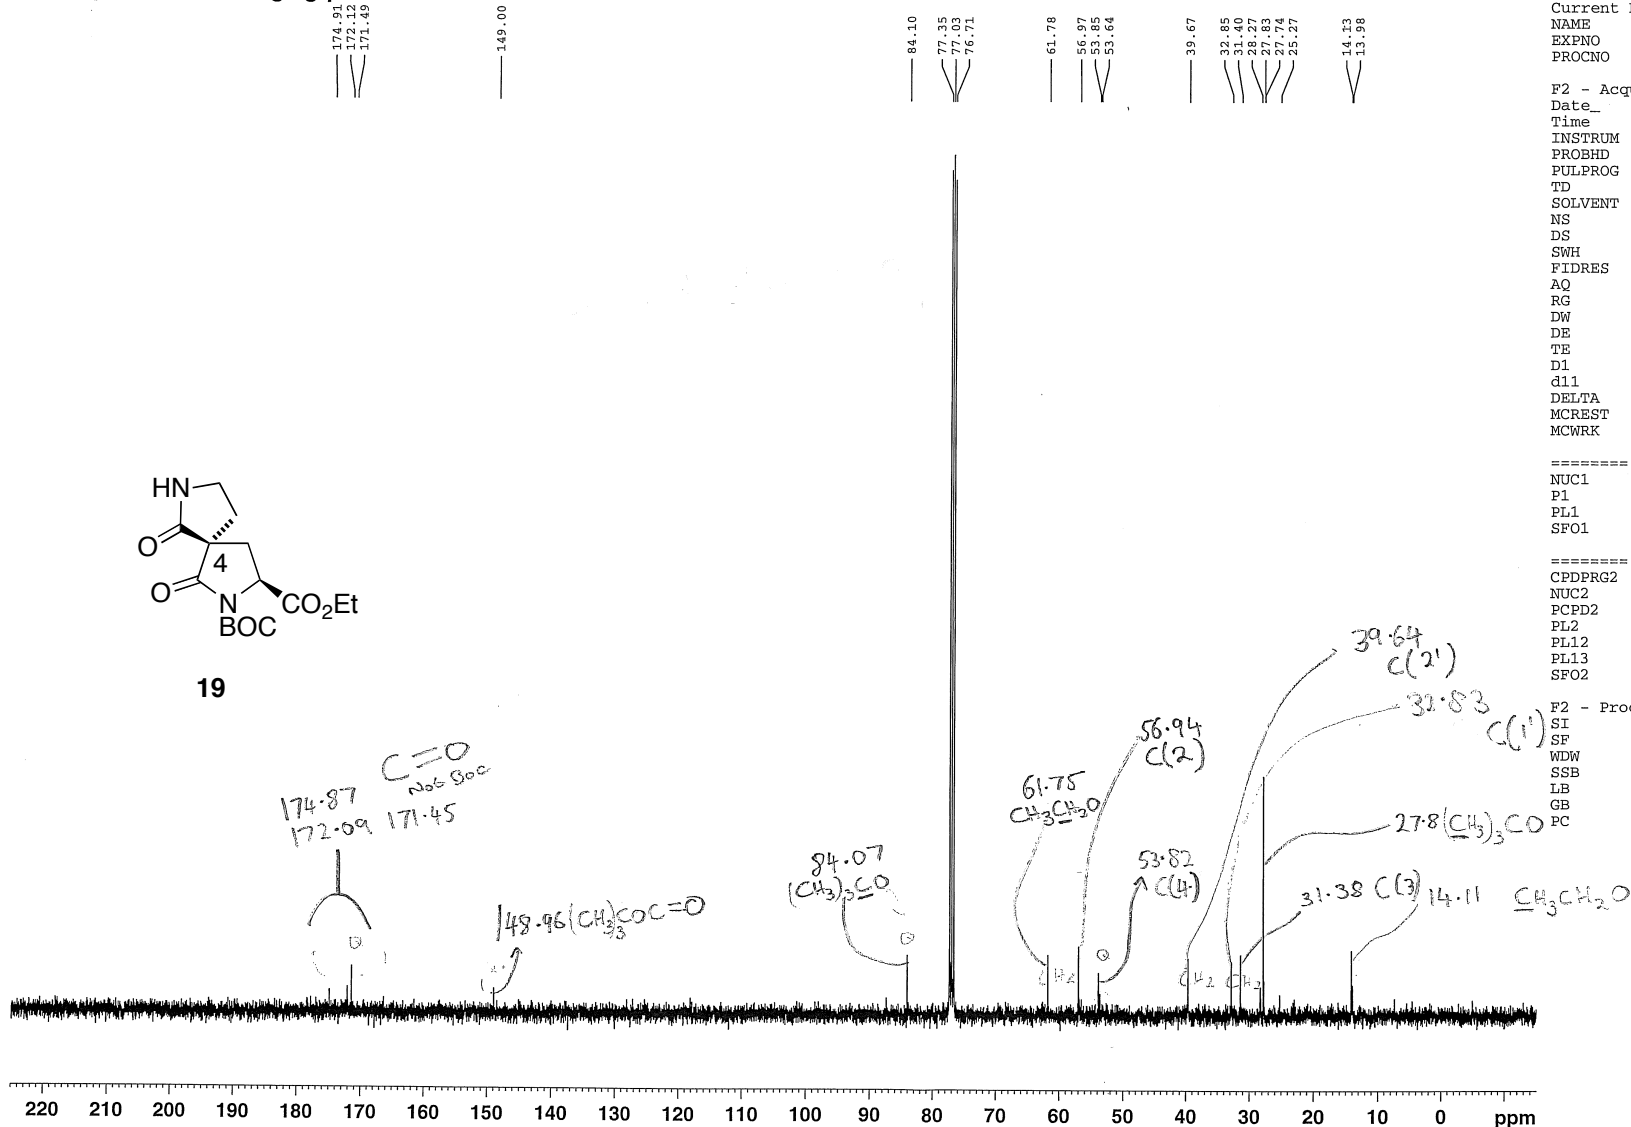

Instrument DQX400  
Chemist RDS  
Group MGM  
RS01-15-2nd 22.  
h1acq.au CDCl3 e:\mgrp 51

NMR@CHEM.OX

Current Data Parameters  
NAME Mar23-2007-51  
EXPNO 1  
PROCNO 1

F2 - Acquisition Parameters  
Date\_ 20070324  
Time 22.36  
INSTRUM av400  
PROBHD 5 mm QNP 1H/13  
PULPROG zg60  
TD 65536  
SOLVENT CDCl3  
NS 16  
DS 2  
SWH 8278.146 Hz  
FIDRES 0.126314 Hz  
AQ 3.9584243 sec  
RG 90.5  
DW 60.400 usec  
DE 7.50 usec  
TE 294.9 K  
D1 1.00000000 sec

==== CHANNEL f1 =====  
NUC1 1H  
P1 9.00 usec  
PL1 0.00 dB  
SFO1 400.2024714 MHz

F2 - Processing parameters  
SI 32768  
SF 400.2000028 MHz  
WDW EM  
SSB 0  
LB 0.30 Hz  
GB 0  
PC 1.00

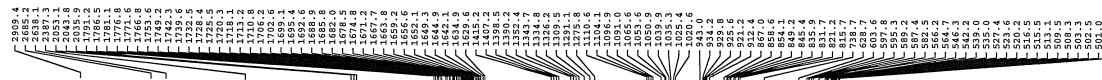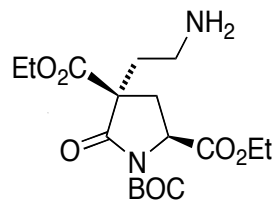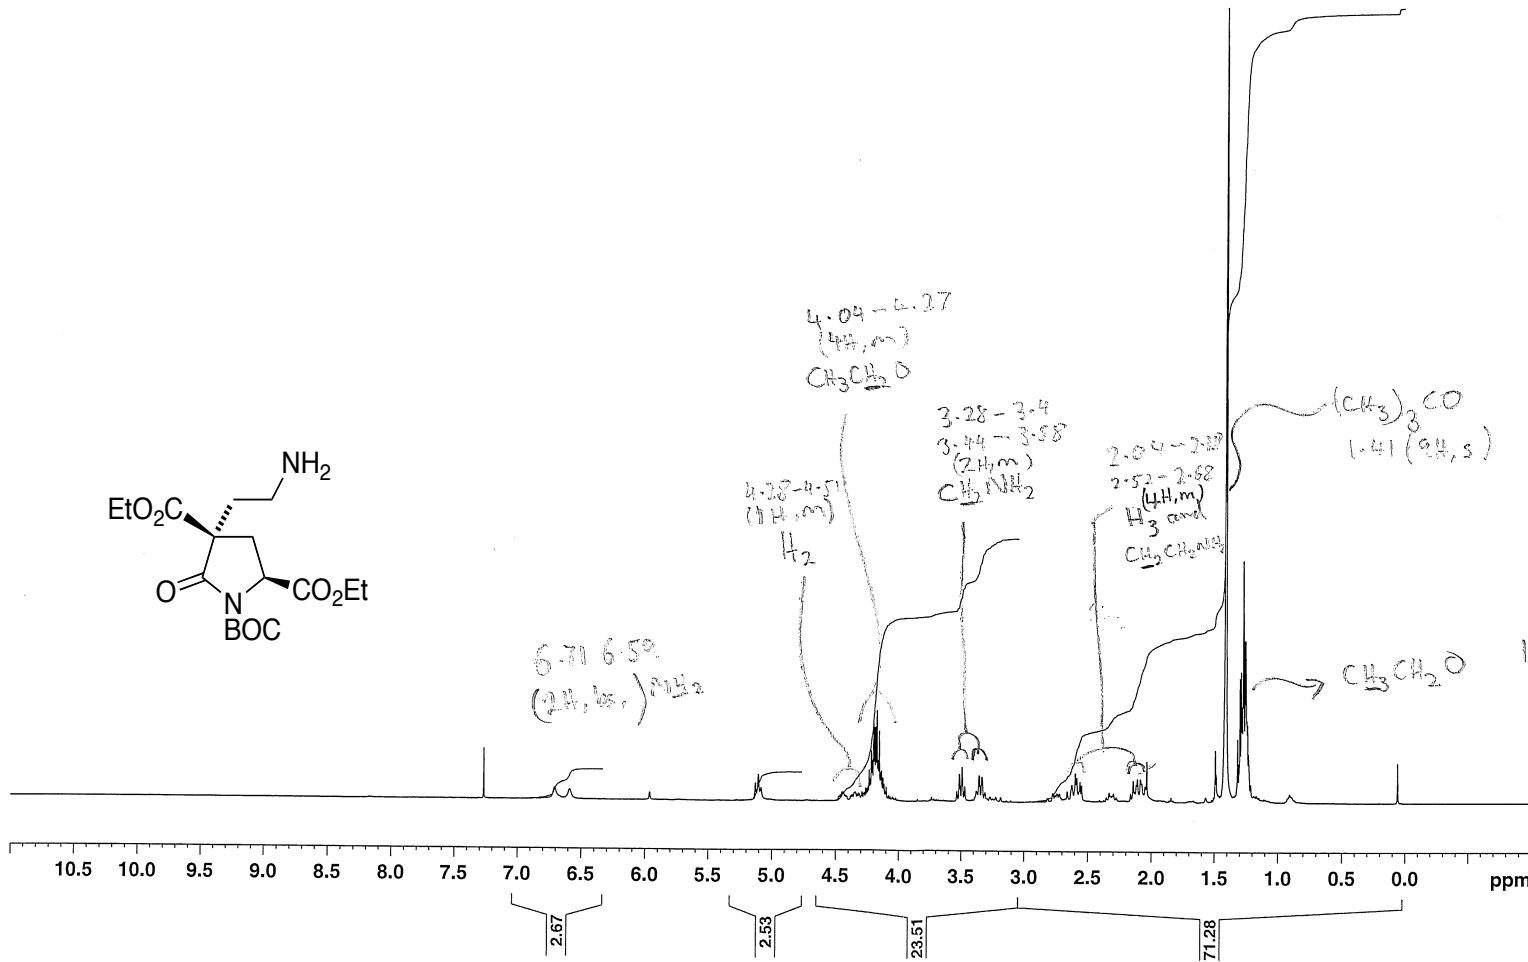

Instrument DQX400  
 Chemist RDS  
 Group MGM  
 RS01-15-2nd  
 c13acq.au CDCl3 e:\mgmgrp 51

NMR@CHEM.OX

Current Data Parameters  
 NAME Mar23-2007-51  
 EXPNO 2  
 PROCNO 1

F2 - Acquisition Parameters  
 Date\_ 20070324  
 Time 22.51  
 INSTRUM av400  
 PROBHD 5 mm QNP 1H/13  
 PULPROG zgpg30  
 TD 65536  
 SOLVENT CDCl3  
 NS 256  
 DS 4  
 SWH 26178.010 Hz  
 FIDRES 0.399445 Hz  
 AQ 1.2517875 sec  
 RG 32768  
 DW 19.100 usec  
 DE 7.50 usec  
 TE 295.1 K  
 D1 2.0000000 sec  
 d11 0.0300000 sec  
 DELTA 1.89999998 sec  
 MCREST 0.00000000 sec  
 MCWRK 0.01500000 sec

==== CHANNEL f1 =====  
 NUC1 13C  
 P1 9.50 usec  
 PL1 0.00 dB  
 SFO1 100.6403931 MHz

==== CHANNEL f2 =====  
 CPDPRG2 waltz16  
 NUC2 1H  
 PCPD2 80.00 usec  
 PL2 0.00 dB  
 PL12 19.00 dB  
 PL13 25.00 dB  
 SFO2 400.2016008 MHz

F2 - Processing parameters  
 SI 32768  
 SF 100.6303718 MHz  
 WDW EM  
 SSB 0  
 LB 1.00 Hz  
 GB 0  
 PC 1.40

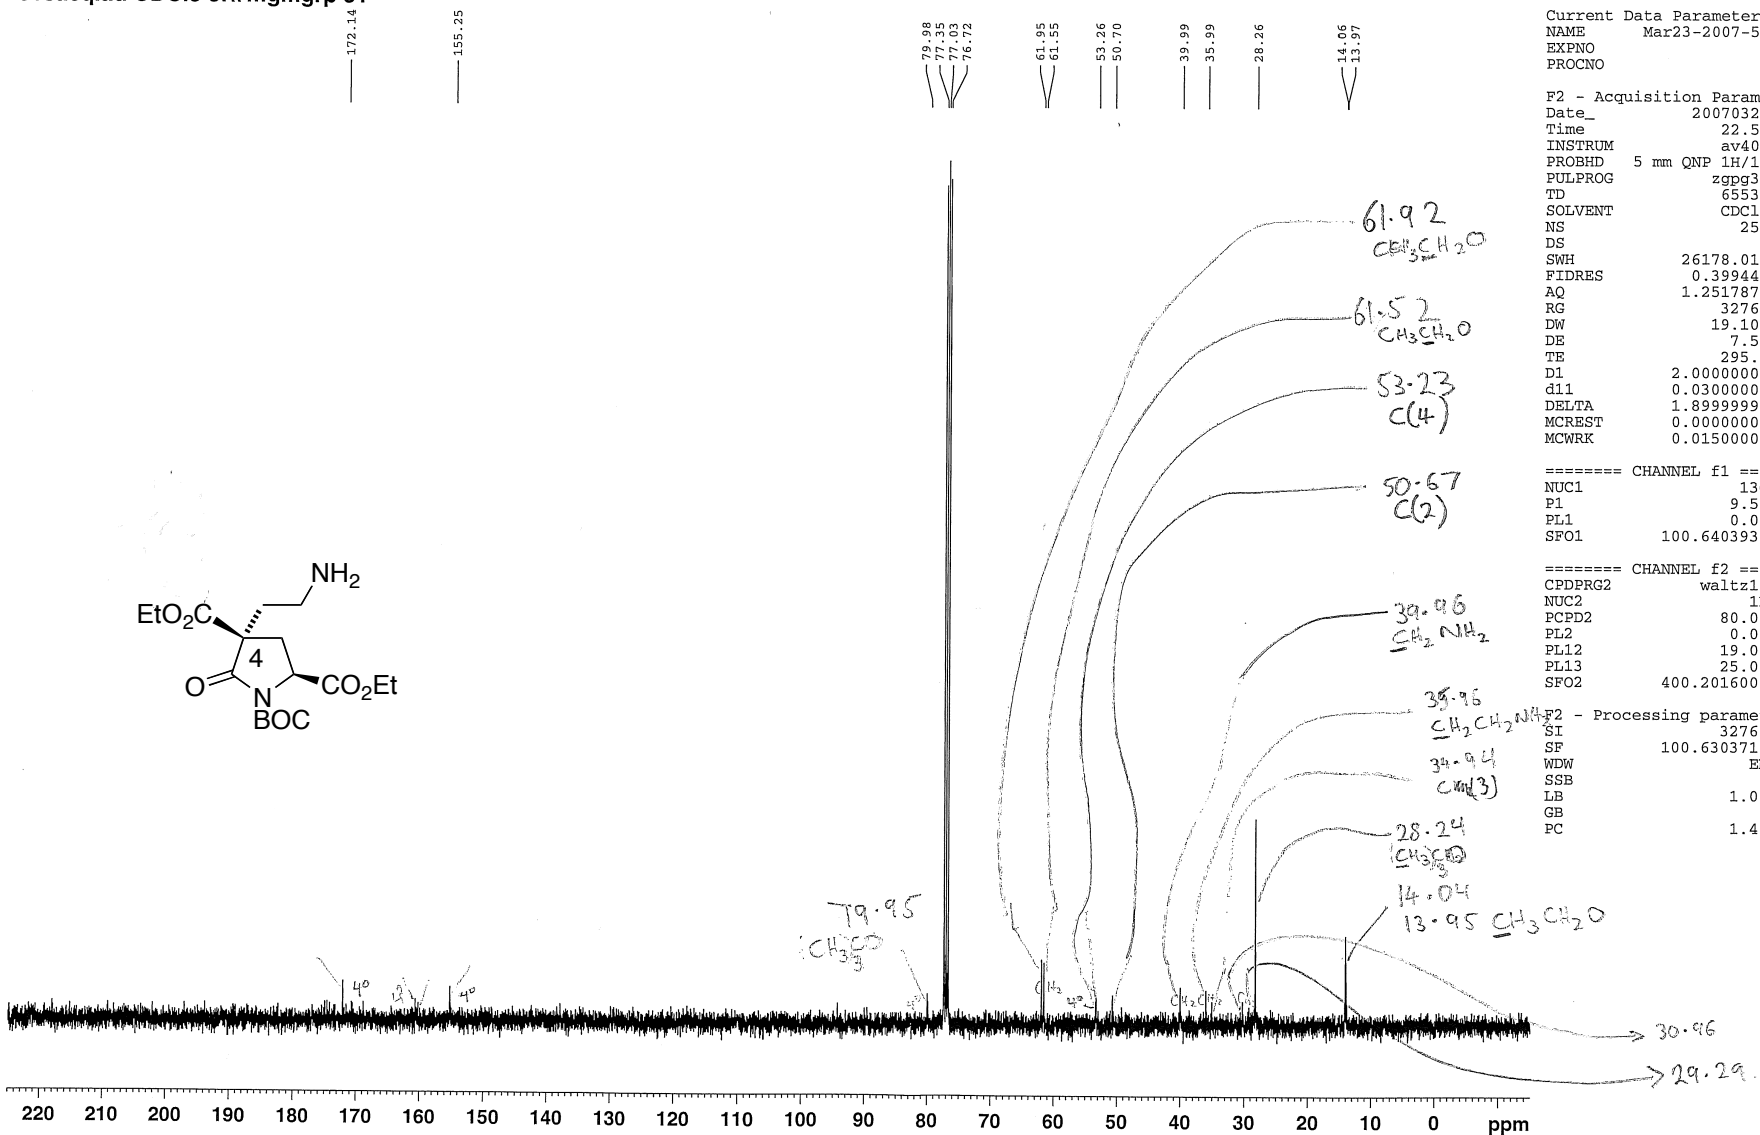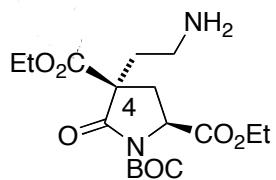

Supplement: c1ob05708a.pdf [file c1ob05708a.pdf]
